# Supplementary material for: Comprehensive multiscale analysis of lactate metabolic dynamics in vitro and in vivo using highly responsive biosensors
Source: Springer Nature journal article supplement (doi:10.1038/s41596-023-00948-y), 2024-02-02
Supplement: MOESM1 [file 41596_2023_948_MOESM1_ESM11.pdf]

# Comprehensive multiscale analysis of lactate metabolic dynamics in vitro and in vivo using highly responsive biosensors

In the format provided by the authors and unedited

## Supplementary Information

### Comprehensive multiscale analysis of lactate metabolic dynamics *in vitro* and *in vivo* using highly responsive biosensors

Aoxue Wang<sup>1,2,7</sup>, Yejun Zou<sup>1,2,7</sup>, Shuning Liu<sup>1,7</sup>, Xiuze Zhang<sup>1,7</sup>, Ting Li<sup>1,2\*</sup>, Lijuan Zhang<sup>1</sup>, Ruwen Wang<sup>3</sup>, Yale Xia<sup>1</sup>, Xie Li<sup>1,2</sup>, Zhuo Zhang<sup>1,2</sup>, Tiemin Liu<sup>4</sup>, Zhenyu Ju<sup>5</sup>, Ru Wang<sup>3\*</sup>, Joseph Loscalzo<sup>6</sup>, Yi Yang<sup>1\*</sup>, Yuzheng Zhao<sup>1,2\*</sup>

<sup>1</sup>Optogenetics&Synthetic Biology Interdisciplinary Research Center, Shanghai Frontiers Science Center of Optogenetic Techniques for Cell Metabolism, State Key Laboratory of Bioreactor Engineering, School of Pharmacy, East China University of Science and Technology, 130 Mei Long Road, Shanghai 200237, China

<sup>2</sup>Research Unit of New Techniques for Live-cell Metabolic Imaging, Chinese Academy of Medical Sciences, Beijing 100730, China

<sup>3</sup>School of Exercise and Health, Shanghai University of Sport, Shanghai 200438, China

<sup>4</sup>State Key Laboratory of Genetic Engineering, Department of Endocrinology and Metabolism, Institute of Metabolism and Integrative Biology, Human Phenome Institute, School of Life Sciences, Zhongshan Hospital, Fudan University, Shanghai 200438, China

<sup>5</sup>Key Laboratory of Regenerative Medicine of Ministry of Education, Guangzhou Regenerative Medicine and Health Guangdong Laboratory, Institute of Aging and Regenerative Medicine, Jinan University, Guangzhou 510632, China

<sup>6</sup>Department of Medicine, Brigham and Women's Hospital, Harvard Medical School, Boston, MA 02115, USA

<sup>7</sup>These authors contributed equally

Correspondence should be addressed to T.L. ([tingli@ecust.edu.cn](mailto:tingli@ecust.edu.cn)), R.W. ([wangru@sus.edu.cn](mailto:wangru@sus.edu.cn)), Y.Y. ([yiyang@ecust.edu.cn](mailto:yiyang@ecust.edu.cn)) and Y. Zhao ([yuzhengzhao@ecust.edu.cn](mailto:yuzhengzhao@ecust.edu.cn))

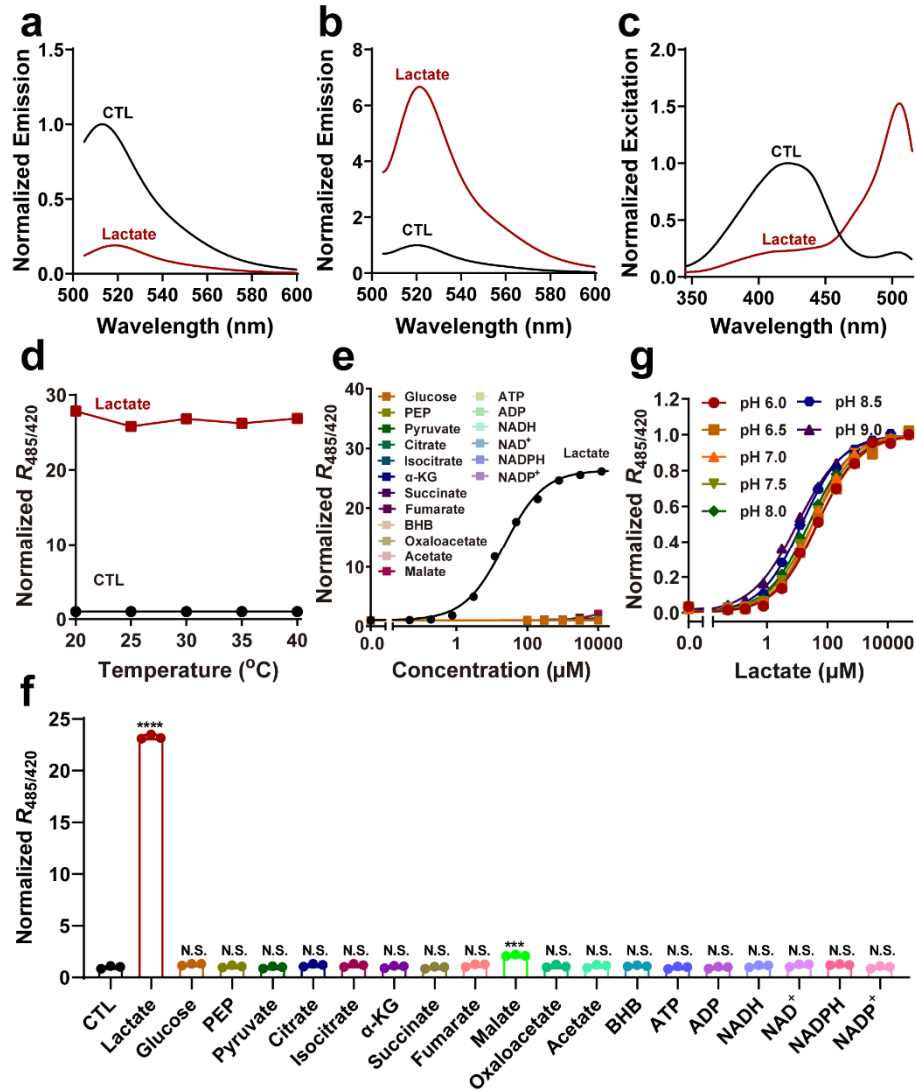

**Supplementary Fig. 1 Characterization of lactate biosensor FiLa-H.**

**a-c**, Emission spectra (a, b) and excitation spectra (c) of purified FiLa-H in the control condition (black), and saturated lactate (dark red), normalized to the peak intensity in the control condition. Excitation wavelength was fixed at 420 nm (a) or 490 nm (b), respectively. The excitation spectrum of FiLa-H recorded at an emission wavelength of 530 nm has maxima around 420 and 500 nm. **d**, Fluorescence response of FiLa-H to 50 mM lactate at various temperatures ( $n=3$ ). **e**, Fluorescence response of FiLa-H at the indicated concentrations of lactate or other metabolites. Data are normalized to the initial value ( $n=3$ ). PEP, phosphoenolpyruvate;  $\alpha$ -KG,  $\alpha$ -ketoglutarate; BHB,  $\beta$ -hydroxybutyrate. **f**, Fluorescence response of FiLa-H to lactate or other metabolites at 10 mM ( $n=3$ ). **g**, Lactate titration curves of FiLa-H at the indicated pH. Data are the mean  $\pm$  SEM (d-g). All  $p$  values were obtained using unpaired two-tailed Student's  $t$  test. \*\*\* $p < 0.001$ , \*\*\*\* $p < 0.0001$ , N.S., not significant.

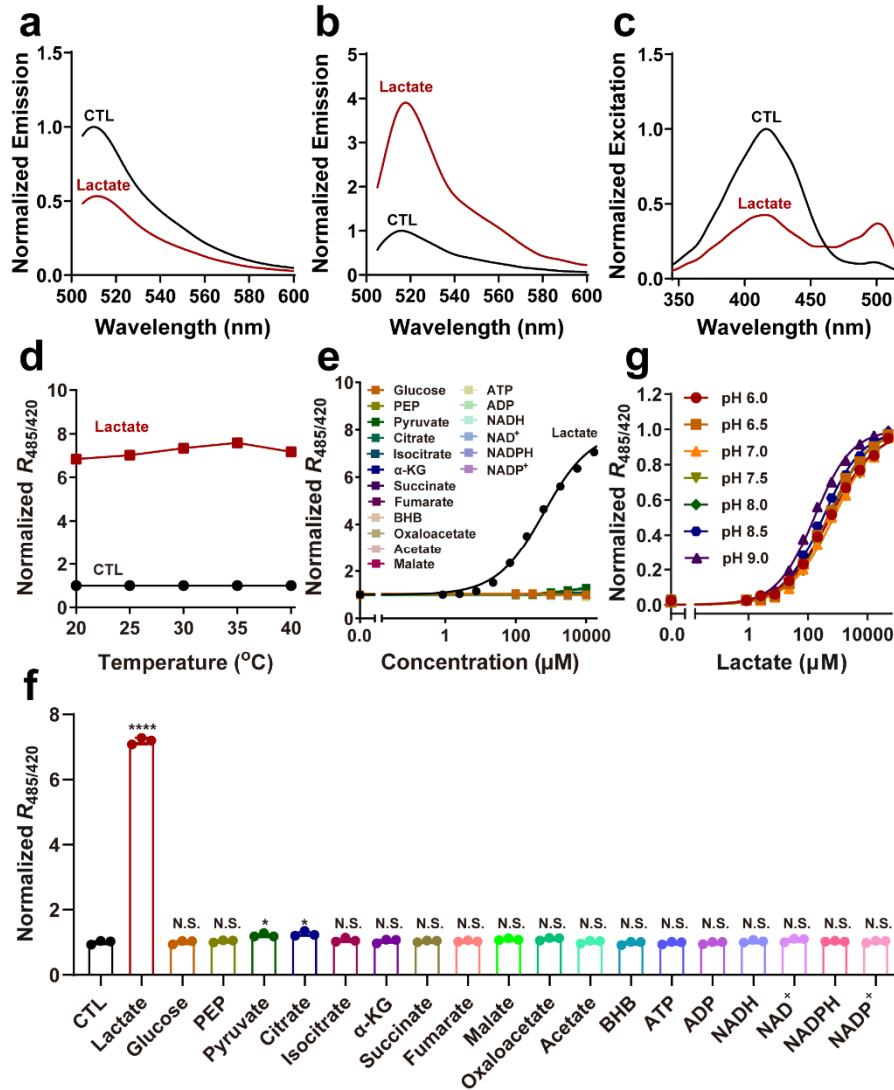

**Supplementary Fig. 2 Characterization of lactate biosensor FiLa-L.**

**a-c**, Emission spectra (a, b) and excitation spectra (c) of purified FiLa-L in the control condition (black), and saturated lactate (dark red), normalized to the peak intensity in the control condition. Excitation wavelength was fixed at 420 nm (a) or 490 nm (b), respectively. The excitation spectrum of FiLa-L recorded at an emission wavelength of 540 nm has maxima around 420 and 500 nm. **d**, Fluorescence response of FiLa-L to 50 mM lactate at various temperatures ( $n=3$ ). **e**, Fluorescence response of FiLa-L at the indicated concentrations of lactate or other metabolites. Data are normalized to the initial value ( $n=3$ ). PEP, phosphoenolpyruvate;  $\alpha$ -KG,  $\alpha$ -ketoglutarate; BHB,  $\beta$ -hydroxybutyrate. **f**, Fluorescence response of FiLa-L to lactate or other metabolites at 10 mM ( $n=3$ ). **g**, Lactate titration curves of FiLa-L at the indicated pH. Data are the mean  $\pm$  SEM (d-g). All  $p$  values were obtained using unpaired two-tailed Student's  $t$  test. \* $p < 0.05$ , \*\*\*\* $p < 0.0001$ , N.S., not significant.

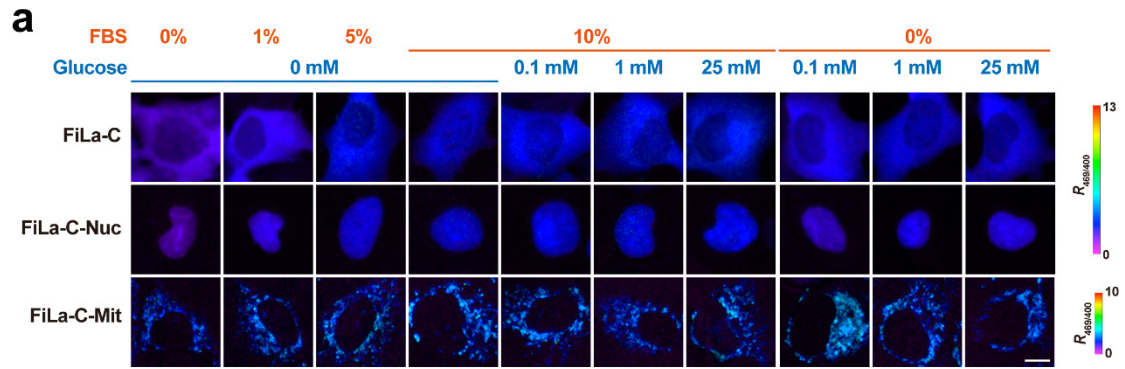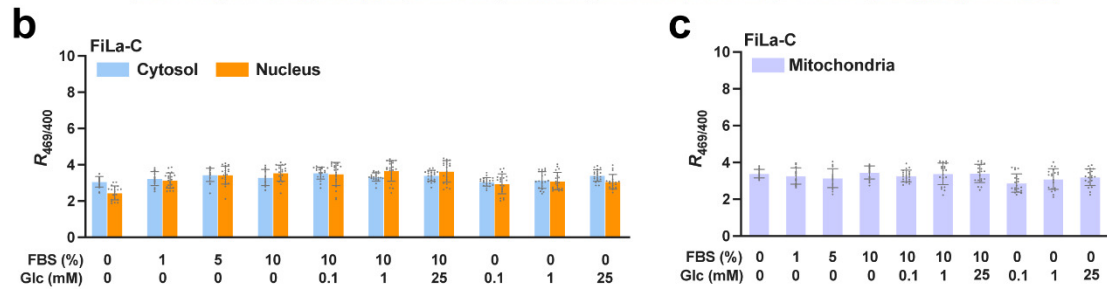

**Supplementary Fig. 3 Fluorescence response of FiLa-C in live cells to different nutritional conditions.**

**a-c**, Fluorescence images (a) and quantification (b, c, n=20) of FiLa-C expressed in cytosol (top), nucleus (middle) or mitochondria (bottom) of HEK-293. Cells were cultured in different levels of glucose (0, 0.1, 1 and 25 mM) and fetal bovine serum (FBS) (0, 1%, 5% and 10%). Scale bars, 10  $\mu$ m. Data are presented as the mean  $\pm$  SD (b, c).

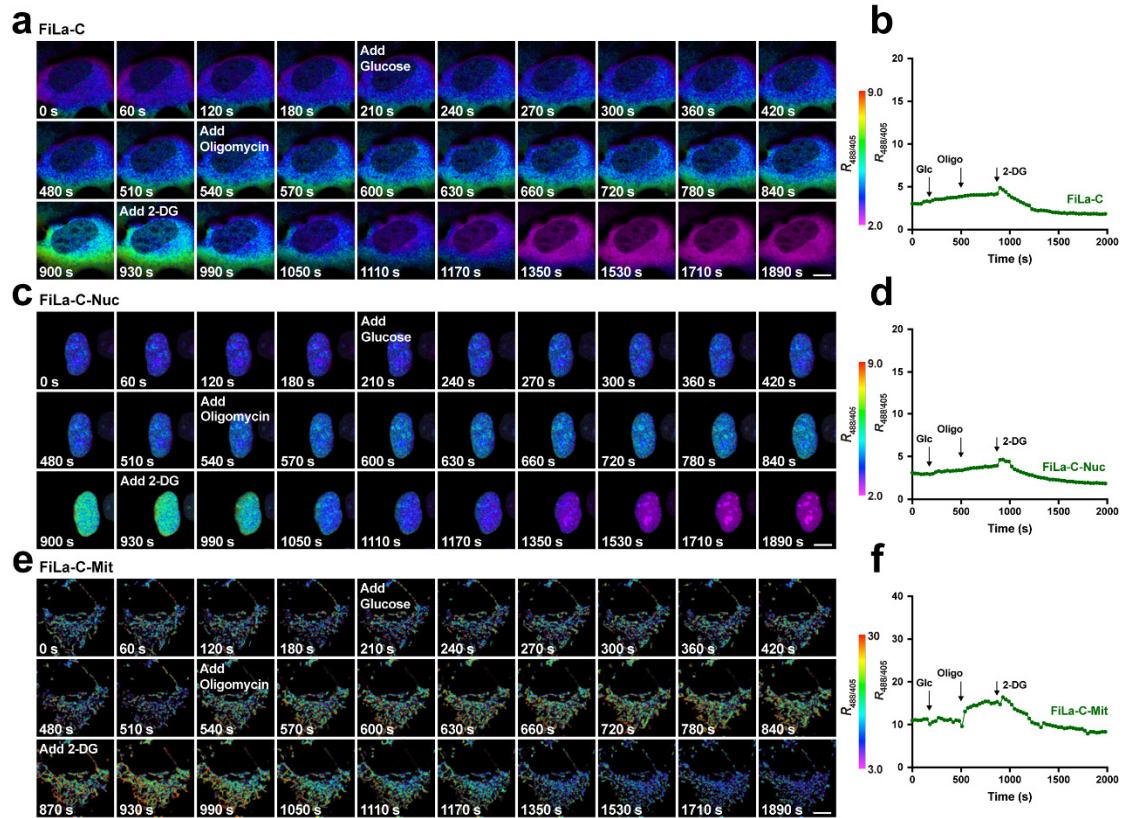

**Supplementary Fig. 4 Fluorescence response of FiLa-C in live cells to three chemicals.**

**a-f**, Fluorescence images (**a**, **c**, **e**) and quantification (**b**, **d**, **f**) of FiLa-C expressed in cytosol (**a**, **b**), nucleus (**c**, **d**) or mitochondria (**e**, **f**) of HEK-293. Cells were treated with 1 mM glucose, 1  $\mu$ M oligomycin and 50 mM 2-DG successively at the indicated time. Scale bars, 10  $\mu$ m.

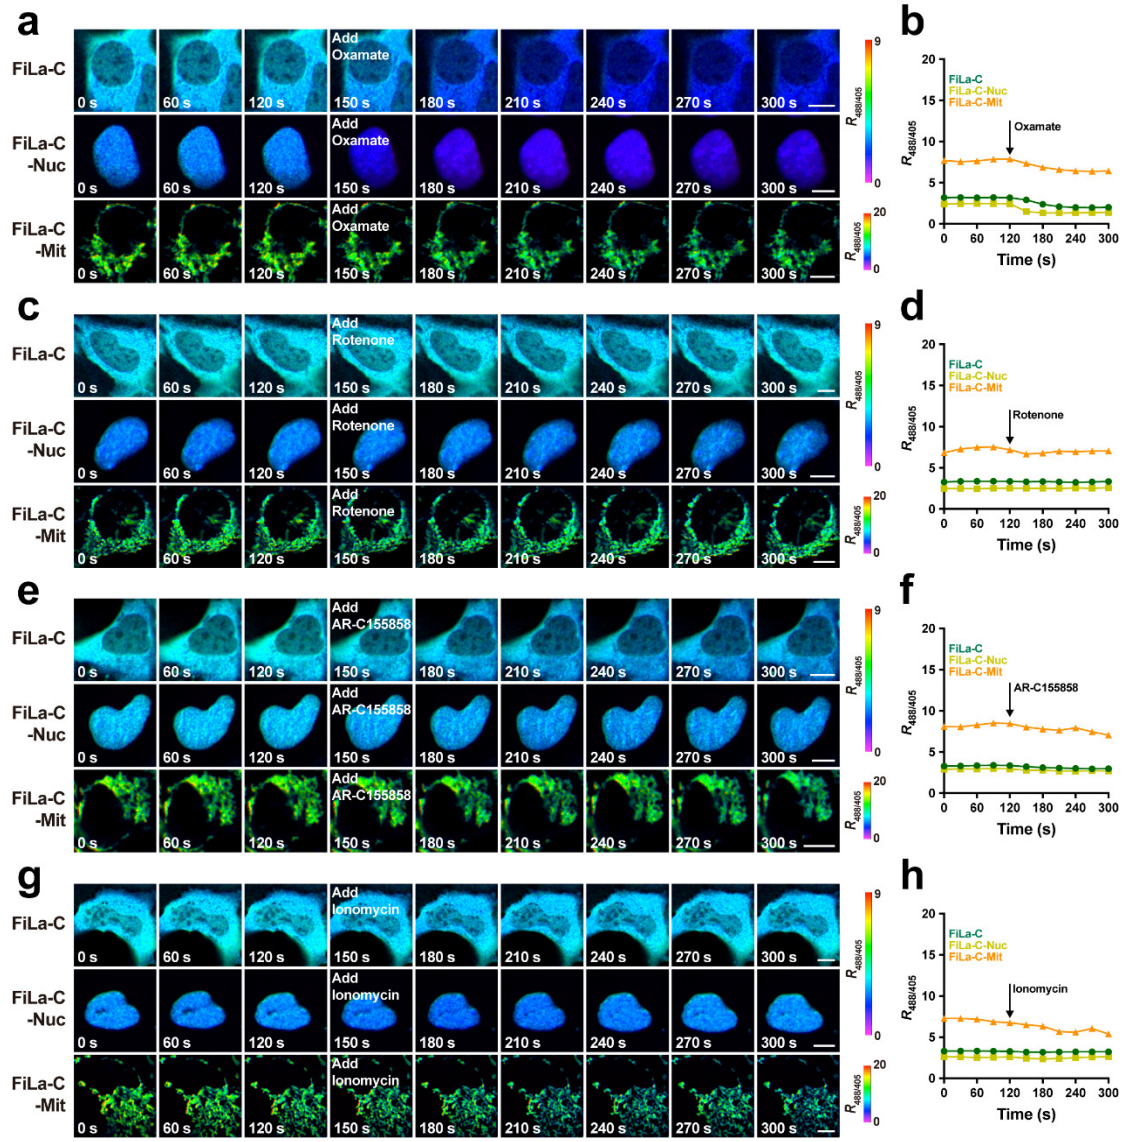

**Supplementary Fig. 5 Fluorescence response of FiLa-C in live cells to four chemicals.**

**a-h**, Fluorescence images (a, c, e, g) and quantification (b, d, f, h) of FiLa-C expressed in the cytosol (top), nucleus (middle) or mitochondria (bottom) of HEK-293 cells. Cells were treated with 10 mM oxamate (a, b), 10  $\mu$ M rotenone (c, d), 2  $\mu$ M AR-C155858 (e, f) or 2  $\mu$ M ionomycin (g, h). Scale bars, 10  $\mu$ m.

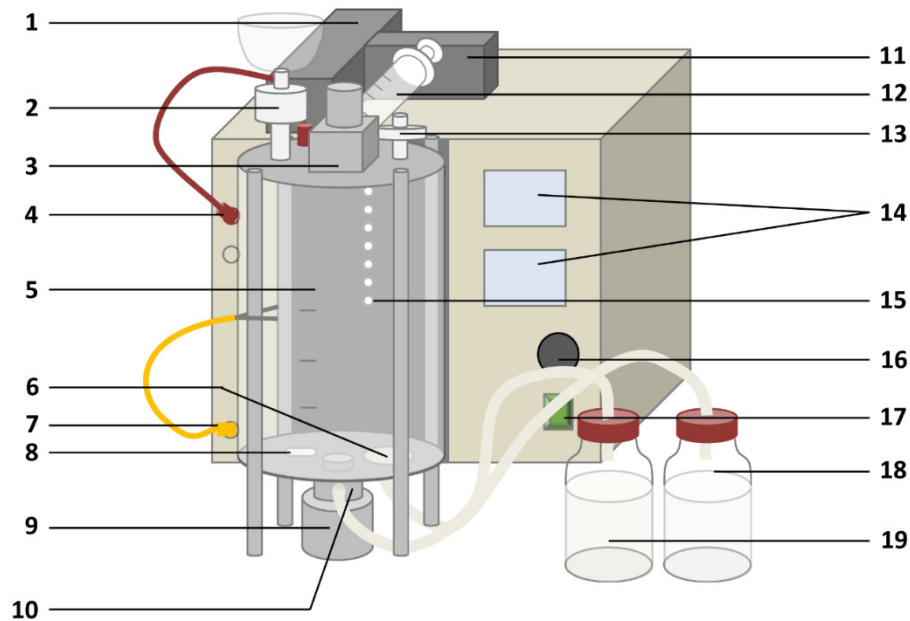

**Supplementary Fig. 6 Schematic representation of the Encapsulator B-395 Pro system.**

**1** Liquid flow regulating valve, **2** Liquid filter, **3** Bead producing unit (with a nozzle), **4** EDU (Voltage outlet), **5** Glass cylinder of reaction vessel, **6** Filter of drain line, **7** Plug for grounding wire, **8** Magnetic stirrer bead, **9** Magnetic stirrer, **10** Harvesting valve, **11** Syringe pump, **12** Vibration unit, **13** Air filter, **14** Control panel (upper for vibration frequency & electrode, lower for syringe pump, magnetic stirrer control & pressure indication), **15** Stroboscope lamp, **16** Pressure regulating valve, **17** Mains switch, **18** Bead collecting bottle, **19** Liquid waste bottle. The reaction unit includes 2, 3, 5, 6, 10, 13, 18, 19. The control unit includes 1, 4, 7, 8, 9, 11, 12, 14, 15, 16, 17.



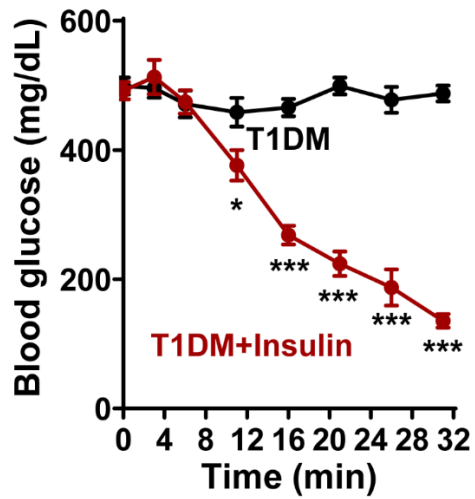

**Supplementary Fig. 7 Blood glucose monitoring of T1DM mice by insulin therapy.**

Insulin (1.25 units/kg) was injected via intraperitoneal injection and blood glucose was measured (n=5 mice). Data are the mean  $\pm$  SEM. All *p* values were obtained using unpaired two-tailed Student's *t* test. \**p* < 0.05, \*\*\**p* < 0.001. All procedures involving animals were approved by the Institutional Animal Care and Use Committee of East China University of Science and Technology.

| Tai Chi athletes |     |             |             |                          | Rugby athletes |     |             |             |                          |
|------------------|-----|-------------|-------------|--------------------------|----------------|-----|-------------|-------------|--------------------------|
| No.              | Age | Height (cm) | Weight (kg) | BMI (kg/m <sup>2</sup> ) | No.            | Age | Height (cm) | Weight (kg) | BMI (kg/m <sup>2</sup> ) |
| 1                | 20  | 180         | 72          | 22.2                     | 1              | 22  | 187         | 93          | 26.6                     |
| 2                | 20  | 170         | 65          | 22.5                     | 2              | 17  | 184         | 65          | 19.2                     |
| 3                | 20  | 163         | 55          | 20.7                     | 3              | 17  | 185         | 70          | 20.5                     |
| 4                | 20  | 180         | 85          | 26.2                     | 4              | 20  | 178         | 75          | 23.7                     |
| 5                | 21  | 184         | 95          | 28.1                     | 5              | 17  | 183         | 63          | 18.8                     |
| 6                | 22  | 179         | 75          | 23.4                     | 6              | 17  | 177         | 74          | 23.6                     |
| 7                | 21  | 187         | 72          | 20.6                     | 7              | 16  | 191         | 88          | 24.1                     |
| 8                | 20  | 173         | 60          | 20.0                     | 8              | 16  | 180         | 68          | 21.0                     |
| 9                | 22  | 175         | 65          | 21.2                     | 9              | 16  | 183         | 69          | 20.6                     |
| 10               | 22  | 180         | 75          | 23.1                     | 10             | 15  | 171         | 55          | 18.8                     |

**Supplementary Fig. 8 The clinical characteristics of 10 Tai Chi athletes and 10 Rugby athletes.**

All procedures related to human research subjects were approved by the School of Exercise and Health, Shanghai University of Sport and were conducted in strict accordance with institutional guidelines.
