# Supplementary material for: Comprehensive multiscale analysis of lactate metabolic dynamics in vitro and in vivo using highly responsive biosensors
Source: Springer Nature journal article supplement (doi:10.1038/s41596-023-00948-y), 2024-02-02
Supplement: MOESM2 [file 41596_2023_948_MOESM2_ESM12.xlsx]

## Sheet: Supplementary Fig.1
Source data for Supplementary Fig.1a-g
Supplementary Fig.1a				Supplementary Fig.1b				Supplementary Fig.1c				Supplementary Fig.1d								Supplementary Fig.1e
Wavelength (nm)	CTL	Lactate		Wavelength (nm)	CTL	Lactate		Wavelength (nm)	CTL	Lactate		Temperature (℃)	CTL			Lactate				Concentration (μM)	Lactate			Glucose			PEP			Pyruvate			Citrate			Isocitrate			α-KG			Succinate			Fumarate			Malate
505	0.882097	0.121153		505	0.693	3.616		300	0.27	0.214		20	1.01646	1.00412	0.979424	27.6543	27.8107	28.0309		0	1.016	1.002	0.982	1.01	0.99	1	0.982	0.994	1.024	0.983	1.02	0.997	1.016	0.976	1.008	1.014	0.964	1.022	0.975	0.987	1.038	0.958	1.024	1.018	0.987	0.999	1.013	1.007	1.01
505.2	0.887326	0.122535		505.2	0.693	3.62		300.2	0.27	0.214		25	1.01493	0.975746	1.00933	25.084	26.1754	26.1007		0.048	1.076	1.036	1.038
505.4	0.892306	0.123892		505.4	0.693	3.625		300.4	0.27	0.214		30	0.992931	1.00064	1.00643	26.3599	26.9826	27.0945		0.191	1.156	1.158	1.182
505.6	0.897286	0.125249		505.6	0.694	3.635		300.6	0.269	0.213		35	0.994475	0.998158	1.00737	26.6133	25.8048	26.2136		0.763	1.79	1.78	1.906
505.8	0.902141	0.126743		505.8	0.695	3.646		300.8	0.269	0.212		40	0.987516	1.00329	1.0092	26.2569	27.3311	26.9744		3.052	4.856	4.994	5.034
506	0.907122	0.128237		506	0.697	3.663		301	0.268	0.211										12.207	12.242	11.609	11.431
506.2	0.911728	0.129607		506.2	0.699	3.679		301.2	0.267	0.211										48.828	17.421	17.693	17.834
506.4	0.916335	0.131101		506.4	0.701	3.703		301.4	0.266	0.21										100				1.032	1.026	1.056	1.022	1.04	1.074	0.995	0.968	0.999	0.974	0.968	1.024	1	0.984	1.006	1.009	1.023	1.031	0.92	0.997	1.029	0.966	0.999	1.009	1.089	1.037
506.6	0.920817	0.132595		506.6	0.703	3.725		301.6	0.264	0.209										195.313	21.691	21.192	21.655
506.8	0.925423	0.134089		506.8	0.706	3.751		301.8	0.263	0.207										300				0.986	0.986	1.02	1.02	1.005	1.005	1.031	1.016	1.046	0.991	0.987	0.991	0.964	1.018	1.014	1.05	1.044	1.046	0.917	1.019	1.027	1.153	1.019	1.029	1.065	1.086
507	0.929656	0.135458		507	0.709	3.778		302	0.261	0.206										781.25	24.291	24.477	25.15
507.2	0.933765	0.137077		507.2	0.713	3.809		302.2	0.26	0.205										1000				0.968	0.974	0.996	1.117	1.111	1.12	1.104	1.102	1.105	1.037	1.047	1.012	0.988	1.05	1.034	1.146	1.142	1.176	0.923	1.027	1.095	1.088	1.114	1.1	1.119	1.128
507.4	0.937998	0.138571		507.4	0.716	3.84		302.4	0.258	0.203										3000				0.994	1.006	1.026	0.997	0.996	1.013	1.142	1.17	1.17	1.138	1.109	1.139	1.076	1.114	1.096	1.126	1.1	1.13	0.992	1.095	1.058	1.274	1.288	1.359	1.483	1.423
507.6	0.941982	0.140065		507.6	0.72	3.876		302.6	0.256	0.202										3125	25.014	25.838	25.782
507.8	0.945842	0.141559		507.8	0.723	3.911		302.8	0.254	0.2										10000				1.054	1.014	1.058	1.04	1.059	1.045	1.229	1.239	1.239	1.265	1.278	1.321	1.25	1.246	1.285	1.144	1.15	1.162	1.12	1.237	1.176	1.291	1.325	1.28	2.102	2.166
508	0.949826	0.143053		508	0.727	3.951		303	0.252	0.198										12500	26.391	25.936	26.074
508.2	0.953436	0.144422		508.2	0.731	3.99		303.2	0.25	0.197										50000	27.473	26.976	27.126
508.4	0.956922	0.145916		508.4	0.736	4.034		303.4	0.247	0.195
508.6	0.960408	0.147286		508.6	0.741	4.076		303.6	0.245	0.193
508.8	0.963645	0.14878		508.8	0.746	4.122		303.8	0.243	0.191
509	0.966882	0.150149		509	0.751	4.167		304	0.24	0.19
509.2	0.970369	0.151519		509.2	0.757	4.216		304.2	0.238	0.188
509.4	0.973357	0.152888		509.4	0.762	4.264		304.4	0.236	0.186
509.6	0.976096	0.154258		509.6	0.768	4.316		304.6	0.233	0.184
509.8	0.97871	0.155752		509.8	0.773	4.365		304.8	0.231	0.182
510	0.9812	0.156997		510	0.779	4.419		305	0.228	0.18
510.2	0.983815	0.158367		510.2	0.785	4.472		305.2	0.226	0.178
510.4	0.98618	0.159736		510.4	0.792	4.526		305.4	0.223	0.176
510.6	0.988297	0.160981		510.6	0.797	4.579		305.6	0.221	0.174
510.8	0.99004	0.162351		510.8	0.804	4.636		305.8	0.218	0.173
511	0.991658	0.163596		511	0.81	4.692		306	0.216	0.171
511.2	0.993152	0.164965		511.2	0.817	4.75		306.2	0.213	0.169
511.4	0.994522	0.16621		511.4	0.823	4.806		306.4	0.21	0.167
511.6	0.995767	0.167331		511.6	0.829	4.864		306.6	0.208	0.165
511.8	0.996763	0.168576		511.8	0.836	4.921		306.8	0.205	0.163
512	0.997759	0.169696		512	0.842	4.979		307	0.203	0.162
512.2	0.998879	0.170817		512.2	0.849	5.035		307.2	0.2	0.159
512.4	0.999253	0.171937		512.4	0.855	5.095		307.4	0.198	0.158
512.6	0.999875	0.173058		512.6	0.861	5.151		307.6	0.196	0.156
512.8	1	0.174054		512.8	0.868	5.209		307.8	0.193	0.154
513	1	0.175174		513	0.874	5.265		308	0.191	0.152
513.2	0.999751	0.17617		513.2	0.881	5.322		308.2	0.188	0.151
513.4	0.999875	0.177042		513.4	0.886	5.377		308.4	0.186	0.149
513.6	0.999377	0.178038		513.6	0.892	5.432		308.6	0.183	0.147
513.8	0.998879	0.178785		513.8	0.897	5.488		308.8	0.181	0.145
514	0.998132	0.179656		514	0.904	5.544		309	0.179	0.143
514.2	0.997261	0.180528		514.2	0.909	5.598		309.2	0.177	0.142
514.4	0.996265	0.181275		514.4	0.914	5.651		309.4	0.175	0.14
514.6	0.99502	0.182146		514.6	0.919	5.704		309.6	0.172	0.138
514.8	0.993526	0.182769		514.8	0.925	5.755		309.8	0.17	0.137
515	0.992281	0.183516		515	0.929	5.805		310	0.168	0.135
515.2	0.990413	0.184263		515.2	0.934	5.855		310.2	0.166	0.134
515.4	0.988795	0.184885		515.4	0.94	5.904		310.4	0.164	0.132
515.6	0.986803	0.185383		515.6	0.944	5.95		310.6	0.162	0.131
515.8	0.984686	0.186006		515.8	0.949	5.996		310.8	0.16	0.129
516	0.982321	0.186504		516	0.954	6.043		311	0.158	0.128
516.2	0.979955	0.187126		516.2	0.958	6.087		311.2	0.156	0.126
516.4	0.977216	0.1875		516.4	0.961	6.13		311.4	0.154	0.125
516.6	0.974726	0.187874		516.6	0.965	6.17		311.6	0.152	0.124
516.8	0.971987	0.188247		516.8	0.969	6.209		311.8	0.151	0.122
517	0.969373	0.188621		517	0.973	6.249		312	0.149	0.121
517.2	0.96626	0.188745		517.2	0.976	6.286		312.2	0.147	0.12
517.4	0.963396	0.189119		517.4	0.979	6.321		312.4	0.146	0.119
517.6	0.960035	0.189119		517.6	0.982	6.354		312.6	0.144	0.118
517.8	0.956798	0.189368		517.8	0.985	6.385		312.8	0.142	0.116
518	0.953187	0.189617		518	0.987	6.415		313	0.141	0.115
518.2	0.949701	0.189741		518.2	0.989	6.443		313.2	0.139	0.114
518.4	0.945842	0.189866		518.4	0.992	6.47		313.4	0.138	0.113
518.6	0.942231	0.189866		518.6	0.994	6.496		313.6	0.136	0.112
518.8	0.938123	0.189866		518.8	0.996	6.52		313.8	0.134	0.111
519	0.934014	0.189866		519	0.996	6.543		314	0.133	0.11
519.2	0.929656	0.189741		519.2	0.997	6.562		314.2	0.132	0.109
519.4	0.925797	0.189617		519.4	0.998	6.58		314.4	0.13	0.108
519.6	0.921564	0.189492		519.6	0.999	6.597		314.6	0.129	0.107
519.8	0.917206	0.189243		519.8	0.999	6.611		314.8	0.127	0.106
520	0.9126	0.188994		520	1	6.623		315	0.126	0.105
520.2	0.908242	0.188745		520.2	1	6.635		315.2	0.125	0.104
520.4	0.903511	0.188496		520.4	0.999	6.644		315.4	0.124	0.103
520.6	0.898904	0.187998		520.6	0.999	6.653		315.6	0.122	0.102
520.8	0.8938	0.187625		520.8	0.998	6.658		315.8	0.121	0.101
521	0.888695	0.187251		521	0.997	6.662		316	0.12	0.101
521.2	0.883715	0.186753		521.2	0.996	6.663		316.2	0.119	0.1
521.4	0.878984	0.186255		521.4	0.996	6.663		316.4	0.117	0.099
521.6	0.873879	0.185632		521.6	0.994	6.662		316.6	0.116	0.098
521.8	0.868899	0.185134		521.8	0.992	6.661		316.8	0.115	0.097
522	0.863795	0.184512		522	0.99	6.656		317	0.114	0.097
522.2	0.858566	0.184014		522.2	0.988	6.649		317.2	0.113	0.096
522.4	0.853212	0.183267		522.4	0.985	6.641		317.4	0.112	0.095
522.6	0.847859	0.182644		522.6	0.982	6.633		317.6	0.111	0.094
522.8	0.84238	0.181897		522.8	0.98	6.621		317.8	0.11	0.094
523	0.837027	0.181275		523	0.977	6.609		318	0.109	0.093
523.2	0.831424	0.180528		523.2	0.974	6.596		318.2	0.108	0.092
523.4	0.826071	0.179781		523.4	0.971	6.582		318.4	0.107	0.091
523.6	0.820468	0.179034		523.6	0.968	6.565		318.6	0.107	0.091
523.8	0.81499	0.178162		523.8	0.965	6.548		318.8	0.106	0.09
524	0.809138	0.177291		524	0.961	6.528		319	0.105	0.089
524.2	0.80366	0.176419		524.2	0.958	6.508		319.2	0.104	0.088
524.4	0.798058	0.175423		524.4	0.954	6.485		319.4	0.103	0.088
524.6	0.792455	0.174552		524.6	0.949	6.463		319.6	0.102	0.087
524.8	0.786853	0.173556		524.8	0.944	6.438		319.8	0.101	0.086
525	0.781375	0.172684		525	0.94	6.413		320	0.101	0.086
525.2	0.775647	0.171813		525.2	0.936	6.385		320.2	0.1	0.085
525.4	0.769796	0.170817		525.4	0.931	6.358		320.4	0.099	0.084
525.6	0.763944	0.169696		525.6	0.926	6.327		320.6	0.098	0.084
525.8	0.758342	0.168825		525.8	0.921	6.297		320.8	0.097	0.083
526	0.752615	0.167704		526	0.916	6.266		321	0.096	0.082
526.2	0.747136	0.166708		526.2	0.911	6.236		321.2	0.096	0.082
526.4	0.741409	0.165588		526.4	0.905	6.202		321.4	0.095	0.081
526.6	0.735931	0.164467		526.6	0.901	6.168		321.6	0.094	0.08
526.8	0.730329	0.163347		526.8	0.895	6.131		321.8	0.093	0.079
527	0.724975	0.162351		527	0.89	6.096		322	0.093	0.079
527.2	0.719373	0.16123		527.2	0.883	6.06		322.2	0.092	0.078
527.4	0.71377	0.16011		527.4	0.878	6.023		322.4	0.092	0.077
527.6	0.708167	0.158865		527.6	0.872	5.984		322.6	0.091	0.077
527.8	0.702814	0.157744		527.8	0.867	5.946		322.8	0.09	0.076
528	0.697336	0.156748		528	0.861	5.906		323	0.09	0.075
528.2	0.691858	0.155627		528.2	0.855	5.867		323.2	0.089	0.075
528.4	0.686379	0.154507		528.4	0.848	5.826		323.4	0.088	0.074
528.6	0.68115	0.153386		528.6	0.842	5.785		323.6	0.088	0.074
528.8	0.675548	0.152141		528.8	0.836	5.743		323.8	0.087	0.073
529	0.670319	0.150896		529	0.83	5.703		324	0.087	0.072
529.2	0.66509	0.149776		529.2	0.824	5.66		324.2	0.086	0.072
529.4	0.659861	0.148531		529.4	0.818	5.618		324.4	0.086	0.071
529.6	0.654631	0.147286		529.6	0.812	5.575		324.6	0.085	0.071
529.8	0.649651	0.146165		529.8	0.806	5.532		324.8	0.084	0.07
530	0.644422	0.145045		530	0.799	5.487		325	0.084	0.07
530.2	0.639193	0.143924		530.2	0.793	5.443		325.2	0.083	0.069
530.4	0.634089	0.142679		530.4	0.786	5.397		325.4	0.083	0.068
530.6	0.62886	0.141559		530.6	0.78	5.353		325.6	0.082	0.068
530.8	0.623755	0.140314		530.8	0.773	5.308		325.8	0.082	0.067
531	0.618775	0.139193		531	0.767	5.264		326	0.081	0.066
531.2	0.61367	0.138073		531.2	0.76	5.218		326.2	0.081	0.066
531.4	0.60869	0.136952		531.4	0.754	5.174		326.4	0.081	0.065
531.6	0.603586	0.135832		531.6	0.748	5.127		326.6	0.08	0.065
531.8	0.59873	0.134711		531.8	0.741	5.082		326.8	0.08	0.064
532	0.59375	0.133591		532	0.734	5.037		327	0.079	0.064
532.2	0.589019	0.132346		532.2	0.728	4.992		327.2	0.079	0.063
532.4	0.584288	0.131225		532.4	0.722	4.947		327.4	0.079	0.063
532.6	0.579557	0.130105		532.6	0.715	4.902		327.6	0.078	0.062
532.8	0.57495	0.128984		532.8	0.709	4.857		327.8	0.078	0.062
533	0.570468	0.127864		533	0.703	4.814		328	0.078	0.061
533.2	0.565737	0.126619		533.2	0.697	4.769		328.2	0.077	0.061
533.4	0.561255	0.125623		533.4	0.691	4.725		328.4	0.077	0.06
533.6	0.556648	0.124452		533.6	0.685	4.681		328.6	0.077	0.059
533.8	0.552042	0.123431		533.8	0.679	4.638		328.8	0.076	0.059
534	0.54756	0.122348		534	0.672	4.594		329	0.076	0.058
534.2	0.543202	0.121277		534.2	0.667	4.553		329.2	0.076	0.058
534.4	0.538845	0.120244		534.4	0.66	4.509		329.4	0.076	0.057
534.6	0.534612	0.119223		534.6	0.655	4.467		329.6	0.076	0.057
534.8	0.530254	0.118127		534.8	0.648	4.424		329.8	0.075	0.057
535	0.526145	0.117131		535	0.642	4.382		330	0.075	0.056
535.2	0.521788	0.116111		535.2	0.636	4.339		330.2	0.075	0.056
535.4	0.517679	0.115052		535.4	0.63	4.298		330.4	0.075	0.055
535.6	0.513571	0.113982		535.6	0.624	4.256		330.6	0.075	0.055
535.8	0.509587	0.112973		535.8	0.618	4.216		330.8	0.074	0.055
536	0.505478	0.11194		536	0.613	4.174		331	0.074	0.054
536.2	0.501619	0.110919		536.2	0.607	4.135		331.2	0.074	0.054
536.4	0.497634	0.109898		536.4	0.602	4.094		331.4	0.074	0.054
536.6	0.493775	0.108952		536.6	0.596	4.054		331.6	0.074	0.053
536.8	0.489791	0.107943		536.8	0.591	4.014		331.8	0.074	0.053
537	0.486056	0.107009		537	0.585	3.975		332	0.074	0.053
537.2	0.482321	0.106013		537.2	0.58	3.936		332.2	0.074	0.052
537.4	0.478586	0.10508		537.4	0.574	3.897		332.4	0.074	0.052
537.6	0.474726	0.104121		537.6	0.569	3.86		332.6	0.074	0.052
537.8	0.470991	0.103225		537.8	0.564	3.822		332.8	0.074	0.051
538	0.467131	0.102303		538	0.559	3.785		333	0.074	0.051
538.2	0.463645	0.101444		538.2	0.554	3.75		333.2	0.074	0.051
538.4	0.45991	0.100535		538.4	0.548	3.714		333.4	0.074	0.051
538.6	0.4563	0.099689		538.6	0.544	3.678		333.6	0.074	0.05
538.8	0.452689	0.09878		538.8	0.538	3.642		333.8	0.074	0.05
539	0.449328	0.097921		539	0.534	3.609		334	0.074	0.05
539.2	0.445842	0.097087		539.2	0.529	3.574		334.2	0.074	0.049
539.4	0.44248	0.096252		539.4	0.524	3.54		334.4	0.074	0.049
539.6	0.439119	0.095381		539.6	0.519	3.506		334.6	0.074	0.049
539.8	0.435757	0.094572		539.8	0.515	3.472		334.8	0.074	0.049
540	0.432395	0.09375		540	0.51	3.44		335	0.074	0.049
540.2	0.429034	0.092991		540.2	0.505	3.408		335.2	0.074	0.048
540.4	0.425672	0.092169		540.4	0.501	3.376		335.4	0.074	0.048
540.6	0.42256	0.091397		540.6	0.496	3.344		335.6	0.074	0.048
540.8	0.419323	0.0906		540.8	0.492	3.312		335.8	0.074	0.048
541	0.41621	0.089878		541	0.488	3.281		336	0.075	0.048
541.2	0.413222	0.089143		541.2	0.483	3.251		336.2	0.075	0.048
541.4	0.41011	0.088409		541.4	0.479	3.221		336.4	0.075	0.047
541.6	0.406748	0.087687		541.6	0.475	3.19		336.6	0.075	0.047
541.8	0.40376	0.086952		541.8	0.471	3.161		336.8	0.075	0.047
542	0.400896	0.086267		542	0.467	3.132		337	0.075	0.047
542.2	0.397784	0.085545		542.2	0.463	3.103		337.2	0.075	0.047
542.4	0.394796	0.084873		542.4	0.459	3.076		337.4	0.076	0.047
542.6	0.391932	0.084151		542.6	0.455	3.048		337.6	0.076	0.047
542.8	0.388944	0.083429		542.8	0.451	3.021		337.8	0.076	0.047
543	0.386081	0.082756		543	0.447	2.995		338	0.076	0.046
543.2	0.383217	0.082109		543.2	0.443	2.968		338.2	0.077	0.046
543.4	0.380354	0.081462		543.4	0.44	2.942		338.4	0.077	0.046
543.6	0.377366	0.080789		543.6	0.436	2.917		338.6	0.077	0.046
543.8	0.374502	0.080117		543.8	0.432	2.891		338.8	0.078	0.046
544	0.371763	0.079495		544	0.428	2.866		339	0.078	0.046
544.2	0.369024	0.078872		544.2	0.425	2.842		339.2	0.078	0.046
544.4	0.366285	0.0782		544.4	0.421	2.819		339.4	0.078	0.046
544.6	0.363546	0.077639		544.6	0.418	2.795		339.6	0.079	0.046
544.8	0.360807	0.077017		544.8	0.415	2.77		339.8	0.079	0.045
545	0.358068	0.076394		545	0.411	2.748		340	0.079	0.045
545.2	0.355453	0.075772		545.2	0.408	2.725		340.2	0.08	0.045
545.4	0.352839	0.075199		545.4	0.405	2.703		340.4	0.08	0.045
545.6	0.3501	0.074614		545.6	0.401	2.68		340.6	0.08	0.045
545.8	0.347734	0.074041		545.8	0.398	2.659		340.8	0.081	0.045
546	0.344995	0.073431		546	0.395	2.637		341	0.081	0.045
546.2	0.342505	0.072883		546.2	0.392	2.615		341.2	0.082	0.045
546.4	0.339766	0.072298		546.4	0.389	2.594		341.4	0.082	0.045
546.6	0.337276	0.071763		546.6	0.386	2.574		341.6	0.082	0.045
546.8	0.334661	0.071203		546.8	0.383	2.554		341.8	0.083	0.045
547	0.332171	0.070655		547	0.38	2.534		342	0.083	0.045
547.2	0.329557	0.070132		547.2	0.377	2.514		342.2	0.084	0.045
547.4	0.327067	0.069609		547.4	0.375	2.495		342.4	0.084	0.044
547.6	0.324452	0.069086		547.6	0.372	2.476		342.6	0.085	0.044
547.8	0.321838	0.068551		547.8	0.369	2.457		342.8	0.085	0.044
548	0.319472	0.068053		548	0.366	2.437		343	0.086	0.044
548.2	0.317107	0.067555		548.2	0.363	2.42		343.2	0.086	0.044
548.4	0.314617	0.067044		548.4	0.36	2.401		343.4	0.087	0.044
548.6	0.312375	0.066571		548.6	0.358	2.384		343.6	0.087	0.044
548.8	0.31001	0.066073		548.8	0.355	2.366		343.8	0.088	0.044
549	0.307644	0.06555		549	0.353	2.35		344	0.088	0.044
549.2	0.305154	0.065015		549.2	0.35	2.332		344.2	0.089	0.044
549.4	0.302789	0.064529		549.4	0.347	2.315		344.4	0.09	0.044
549.6	0.300299	0.064031		549.6	0.345	2.298		344.6	0.09	0.044
549.8	0.298058	0.063546		549.8	0.342	2.282		344.8	0.091	0.044
550	0.295692	0.063073		550	0.34	2.266		345	0.091	0.044
550.2	0.293327	0.062587		550.2	0.337	2.25		345.2	0.092	0.044
550.4	0.290961	0.062089		550.4	0.335	2.234		345.4	0.093	0.044
550.6	0.28872	0.061653		550.6	0.333	2.218		345.6	0.093	0.044
550.8	0.286479	0.061143		550.8	0.33	2.202		345.8	0.094	0.044
551	0.284238	0.060682		551	0.328	2.187		346	0.095	0.043
551.2	0.281873	0.060222		551.2	0.325	2.172		346.2	0.095	0.043
551.4	0.279631	0.059798		551.4	0.323	2.157		346.4	0.096	0.043
551.6	0.277266	0.059338		551.6	0.321	2.142		346.6	0.097	0.043
551.8	0.275149	0.058902		551.8	0.318	2.128		346.8	0.098	0.043
552	0.272908	0.058454		552	0.316	2.113		347	0.098	0.043
552.2	0.270792	0.058068		552.2	0.314	2.098		347.2	0.099	0.043
552.4	0.268551	0.057607		552.4	0.311	2.083		347.4	0.1	0.043
552.6	0.266434	0.057184		552.6	0.309	2.069		347.6	0.101	0.043
552.8	0.264193	0.056798		552.8	0.307	2.055		347.8	0.102	0.043
553	0.262077	0.056375		553	0.305	2.041		348	0.103	0.043
553.2	0.25996	0.055914		553.2	0.303	2.027		348.2	0.103	0.044
553.4	0.257844	0.055515		553.4	0.301	2.014		348.4	0.104	0.044
553.6	0.255727	0.055092		553.6	0.298	2		348.6	0.105	0.044
553.8	0.253611	0.054669		553.8	0.296	1.987		348.8	0.106	0.044
554	0.251494	0.054221		554	0.294	1.974		349	0.107	0.044
554.2	0.249502	0.053797		554.2	0.292	1.961		349.2	0.108	0.044
554.4	0.247385	0.053399		554.4	0.29	1.947		349.4	0.109	0.044
554.6	0.245393	0.053013		554.6	0.288	1.934		349.6	0.11	0.044
554.8	0.243277	0.052627		554.8	0.286	1.921		349.8	0.111	0.044
555	0.24116	0.052216		555	0.284	1.908		350	0.112	0.044
555.2	0.239044	0.051818		555.2	0.282	1.895		350.2	0.113	0.044
555.4	0.237052	0.051419		555.4	0.28	1.883		350.4	0.114	0.044
555.6	0.23506	0.051008		555.6	0.278	1.869		350.6	0.115	0.044
555.8	0.233068	0.050623		555.8	0.276	1.856		350.8	0.116	0.044
556	0.230951	0.050224		556	0.275	1.844		351	0.117	0.044
556.2	0.228959	0.049838		556.2	0.273	1.832		351.2	0.119	0.044
556.4	0.226967	0.049465		556.4	0.271	1.819		351.4	0.12	0.044
556.6	0.2251	0.049079		556.6	0.269	1.807		351.6	0.121	0.045
556.8	0.222983	0.048668		556.8	0.267	1.794		351.8	0.122	0.045
557	0.221116	0.048319		557	0.265	1.783		352	0.123	0.045
557.2	0.219124	0.047933		557.2	0.263	1.77		352.2	0.125	0.045
557.4	0.217131	0.047547		557.4	0.261	1.758		352.4	0.126	0.045
557.6	0.215139	0.047136		557.6	0.259	1.745		352.6	0.127	0.046
557.8	0.213272	0.046788		557.8	0.257	1.734		352.8	0.129	0.046
558	0.211404	0.046439		558	0.255	1.72		353	0.13	0.046
558.2	0.209537	0.046053		558.2	0.253	1.708		353.2	0.131	0.046
558.4	0.207669	0.045705		558.4	0.252	1.696		353.4	0.132	0.046
558.6	0.205802	0.045319		558.6	0.25	1.684		353.6	0.134	0.047
558.8	0.203934	0.04497		558.8	0.248	1.672		353.8	0.135	0.047
559	0.202067	0.044597		559	0.246	1.66		354	0.136	0.047
559.2	0.200199	0.044248		559.2	0.244	1.648		354.2	0.138	0.047
559.4	0.198456	0.043887		559.4	0.243	1.636		354.4	0.139	0.048
559.6	0.196589	0.043513		559.6	0.241	1.625		354.6	0.141	0.048
559.8	0.194846	0.043177		559.8	0.239	1.613		354.8	0.142	0.048
560	0.192978	0.042791		560	0.237	1.6		355	0.144	0.048
560.2	0.19136	0.042405		560.2	0.235	1.588		355.2	0.145	0.049
560.4	0.189492	0.042057		560.4	0.233	1.576		355.4	0.147	0.049
560.6	0.187874	0.041733		560.6	0.231	1.564		355.6	0.148	0.049
560.8	0.186006	0.041384		560.8	0.229	1.551		355.8	0.15	0.049
561	0.184263	0.041048		561	0.228	1.54		356	0.151	0.05
561.2	0.18252	0.040687		561.2	0.226	1.528		356.2	0.153	0.05
561.4	0.180777	0.040339		561.4	0.224	1.516		356.4	0.155	0.05
561.6	0.179034	0.03999		561.6	0.222	1.504		356.6	0.156	0.051
561.8	0.177415	0.039641		561.8	0.22	1.493		356.8	0.158	0.051
562	0.175548	0.039255		562	0.218	1.481		357	0.16	0.051
562.2	0.173929	0.038944		562.2	0.217	1.469		357.2	0.162	0.052
562.4	0.172186	0.038583		562.4	0.215	1.457		357.4	0.164	0.052
562.6	0.170568	0.038247		562.6	0.213	1.445		357.6	0.165	0.052
562.8	0.168825	0.037898		562.8	0.211	1.433		357.8	0.167	0.053
563	0.167206	0.037587		563	0.209	1.422		358	0.169	0.053
563.2	0.165588	0.037251		563.2	0.208	1.409		358.2	0.171	0.054
563.4	0.164094	0.036927		563.4	0.206	1.398		358.4	0.173	0.054
563.6	0.162475	0.036554		563.6	0.204	1.387		358.6	0.174	0.054
563.8	0.160981	0.036193		563.8	0.202	1.375		358.8	0.177	0.055
564	0.159363	0.035857		564	0.201	1.364		359	0.179	0.056
564.2	0.157869	0.03552		564.2	0.199	1.352		359.2	0.181	0.056
564.4	0.156375	0.035209		564.4	0.197	1.34		359.4	0.183	0.056
564.6	0.155005	0.034885		564.6	0.195	1.329		359.6	0.185	0.057
564.8	0.153386	0.034562		564.8	0.193	1.317		359.8	0.187	0.057
565	0.152017	0.03425		565	0.192	1.307		360	0.189	0.058
565.2	0.150523	0.033914		565.2	0.19	1.295		360.2	0.191	0.058
565.4	0.149029	0.033616		565.4	0.189	1.284		360.4	0.193	0.059
565.6	0.147535	0.033304		565.6	0.187	1.273		360.6	0.195	0.059
565.8	0.146041	0.032981		565.8	0.185	1.262		360.8	0.198	0.06
566	0.144671	0.032657		566	0.184	1.251		361	0.2	0.06
566.2	0.143177	0.032346		566.2	0.182	1.239		361.2	0.202	0.061
566.4	0.141808	0.032072		566.4	0.18	1.228		361.4	0.205	0.061
566.6	0.140438	0.031773		566.6	0.179	1.216		361.6	0.207	0.062
566.8	0.138944	0.031474		566.8	0.177	1.206		361.8	0.209	0.063
567	0.137575	0.031188		567	0.175	1.195		362	0.212	0.063
567.2	0.136205	0.030876		567.2	0.174	1.184		362.2	0.214	0.064
567.4	0.134836	0.03059		567.4	0.172	1.174		362.4	0.216	0.064
567.6	0.133466	0.030279		567.6	0.171	1.162		362.6	0.219	0.065
567.8	0.132097	0.029993		567.8	0.169	1.152		362.8	0.221	0.065
568	0.130852	0.029719		568	0.168	1.141		363	0.224	0.066
568.2	0.129482	0.029445		568.2	0.166	1.131		363.2	0.226	0.066
568.4	0.128113	0.029158		568.4	0.164	1.12		363.4	0.228	0.067
568.6	0.126743	0.02886		568.6	0.163	1.11		363.6	0.231	0.068
568.8	0.125498	0.028586		568.8	0.161	1.099		363.8	0.234	0.068
569	0.124241	0.028299		569	0.16	1.089		364	0.236	0.069
569.2	0.122958	0.028025		569.2	0.158	1.077		364.2	0.239	0.069
569.4	0.12175	0.027764		569.4	0.156	1.067		364.4	0.241	0.07
569.6	0.120505	0.027502		569.6	0.155	1.056		364.6	0.244	0.071
569.8	0.11926	0.027229		569.8	0.153	1.046		364.8	0.247	0.071
570	0.118065	0.026967		570	0.152	1.036		365	0.249	0.072
570.2	0.116882	0.026731		570.2	0.15	1.026		365.2	0.252	0.073
570.4	0.115687	0.026444		570.4	0.149	1.016		365.4	0.255	0.073
570.6	0.114517	0.026183		570.6	0.147	1.006		365.6	0.258	0.074
570.8	0.113334	0.025921		570.8	0.146	0.996		365.8	0.26	0.075
571	0.112139	0.02566		571	0.144	0.987		366	0.263	0.075
571.2	0.111031	0.025411		571.2	0.143	0.976		366.2	0.266	0.076
571.4	0.109873	0.025149		571.4	0.142	0.967		366.4	0.268	0.077
571.6	0.108777	0.024888		571.6	0.14	0.957		366.6	0.271	0.077
571.8	0.107694	0.024626		571.8	0.139	0.947		366.8	0.274	0.078
572	0.106586	0.02439		572	0.138	0.938		367	0.277	0.079
572.2	0.105515	0.024128		572.2	0.136	0.928		367.2	0.28	0.079
572.4	0.10447	0.023904		572.4	0.135	0.918		367.4	0.283	0.08
572.6	0.103436	0.023655		572.6	0.134	0.91		367.6	0.286	0.081
572.8	0.10239	0.023406		572.8	0.132	0.9		367.8	0.288	0.082
573	0.101332	0.023157		573	0.131	0.891		368	0.292	0.082
573.2	0.100336	0.022933		573.2	0.13	0.882		368.2	0.295	0.083
573.4	0.099365	0.022709		573.4	0.128	0.873		368.4	0.297	0.084
573.6	0.098357	0.022473		573.6	0.127	0.864		368.6	0.3	0.085
573.8	0.097373	0.022249		573.8	0.126	0.855		368.8	0.303	0.085
574	0.096402	0.022037		574	0.124	0.847		369	0.306	0.086
574.2	0.095493	0.0218		574.2	0.123	0.838		369.2	0.309	0.087
574.4	0.094559	0.021576		574.4	0.122	0.83		369.4	0.312	0.087
574.6	0.093601	0.021352		574.6	0.121	0.821		369.6	0.315	0.088
574.8	0.092592	0.021128		574.8	0.119	0.812		369.8	0.319	0.089
575	0.091658	0.020916		575	0.118	0.804		370	0.321	0.09
575.2	0.090737	0.020705		575.2	0.117	0.796		370.2	0.324	0.09
575.4	0.089866	0.020493		575.4	0.116	0.787		370.4	0.328	0.091
575.6	0.088944	0.020306		575.6	0.114	0.779		370.6	0.33	0.092
575.8	0.088048	0.020107		575.8	0.113	0.771		370.8	0.333	0.093
576	0.087151	0.01992		576	0.112	0.762		371	0.337	0.093
576.2	0.086367	0.019734		576.2	0.111	0.755		371.2	0.339	0.094
576.4	0.085471	0.019522		576.4	0.11	0.747		371.4	0.343	0.095
576.6	0.084574	0.019323		576.6	0.109	0.739		371.6	0.346	0.096
576.8	0.083715	0.019124		576.8	0.108	0.731		371.8	0.349	0.096
577	0.082881	0.018937		577	0.106	0.724		372	0.352	0.097
577.2	0.082022	0.018738		577.2	0.105	0.716		372.2	0.355	0.098
577.4	0.081213	0.018526		577.4	0.104	0.708		372.4	0.358	0.099
577.6	0.080416	0.018352		577.6	0.103	0.7		372.6	0.361	0.1
577.8	0.079607	0.018165		577.8	0.102	0.693		372.8	0.365	0.1
578	0.078822	0.017966		578	0.101	0.686		373	0.368	0.101
578.2	0.078038	0.017779		578.2	0.1	0.678		373.2	0.371	0.102
578.4	0.077278	0.01758		578.4	0.099	0.671		373.4	0.374	0.103
578.6	0.076519	0.017418		578.6	0.098	0.664		373.6	0.377	0.104
578.8	0.07571	0.017231		578.8	0.097	0.657		373.8	0.381	0.105
579	0.074963	0.017044		579	0.096	0.65		374	0.384	0.105
579.2	0.074191	0.016882		579.2	0.095	0.643		374.2	0.387	0.106
579.4	0.073456	0.016696		579.4	0.094	0.636		374.4	0.39	0.107
579.6	0.072697	0.016509		579.6	0.093	0.629		374.6	0.393	0.108
579.8	0.071987	0.016335		579.8	0.092	0.622		374.8	0.397	0.108
580	0.071228	0.016173		580	0.091	0.616		375	0.4	0.109
580.2	0.070543	0.016011		580.2	0.09	0.609		375.2	0.403	0.11
580.4	0.069796	0.015849		580.4	0.089	0.602		375.4	0.406	0.111
580.6	0.069173	0.015687		580.6	0.089	0.596		375.6	0.41	0.112
580.8	0.068476	0.015538		580.8	0.088	0.589		375.8	0.413	0.112
581	0.067804	0.015376		581	0.087	0.583		376	0.416	0.113
581.2	0.067144	0.015239		581.2	0.086	0.577		376.2	0.419	0.114
581.4	0.066509	0.015052		581.4	0.085	0.571		376.4	0.422	0.115
581.6	0.065824	0.01489		581.6	0.084	0.565		376.6	0.425	0.116
581.8	0.065214	0.014753		581.8	0.083	0.559		376.8	0.428	0.116
582	0.064554	0.014592		582	0.082	0.553		377	0.431	0.117
582.2	0.063957	0.014455		582.2	0.081	0.547		377.2	0.435	0.118
582.4	0.063334	0.014305		582.4	0.081	0.541		377.4	0.438	0.119
582.6	0.062761	0.014156		582.6	0.08	0.535		377.6	0.441	0.119
582.8	0.062176	0.014006		582.8	0.079	0.529		377.8	0.445	0.12
583	0.061591	0.01387		583	0.078	0.524		378	0.448	0.121
583.2	0.060981	0.01372		583.2	0.078	0.518		378.2	0.451	0.122
583.4	0.060396	0.013571		583.4	0.077	0.513		378.4	0.455	0.123
583.6	0.059811	0.013434		583.6	0.076	0.507		378.6	0.458	0.123
583.8	0.059226	0.013309		583.8	0.075	0.502		378.8	0.462	0.124
584	0.058665	0.01316		584	0.075	0.496		379	0.465	0.125
584.2	0.058105	0.013035		584.2	0.074	0.491		379.2	0.468	0.126
584.4	0.057557	0.012911		584.4	0.073	0.486		379.4	0.472	0.127
584.6	0.056997	0.012761		584.6	0.072	0.481		379.6	0.475	0.128
584.8	0.056437	0.012637		584.8	0.072	0.476		379.8	0.478	0.128
585	0.055914	0.012512		585	0.071	0.471		380	0.481	0.129
585.2	0.055366	0.012379		585.2	0.07	0.466		380.2	0.485	0.13
585.4	0.054893	0.012255		585.4	0.07	0.461		380.4	0.488	0.131
585.6	0.054358	0.01215		585.6	0.069	0.456		380.6	0.491	0.131
585.8	0.053872	0.012013		585.8	0.068	0.452		380.8	0.495	0.132
586	0.053337	0.0119		586	0.068	0.447		381	0.498	0.133
586.2	0.052826	0.011783		586.2	0.067	0.442		381.2	0.502	0.134
586.4	0.052341	0.011673		586.4	0.066	0.438		381.4	0.505	0.134
586.6	0.051843	0.011566		586.6	0.066	0.433		381.6	0.508	0.135
586.8	0.051357	0.011434		586.8	0.065	0.428		381.8	0.511	0.136
587	0.050859	0.011321		587	0.064	0.424		382	0.515	0.136
587.2	0.050361	0.011199		587.2	0.064	0.419		382.2	0.518	0.137
587.4	0.049875	0.011083		587.4	0.063	0.415		382.4	0.522	0.138
587.6	0.049377	0.01098		587.6	0.062	0.411		382.6	0.525	0.139
587.8	0.048942	0.010885		587.8	0.062	0.406		382.8	0.528	0.14
588	0.048494	0.010771		588	0.061	0.402		383	0.532	0.14
588.2	0.048033	0.010649		588.2	0.061	0.398		383.2	0.535	0.141
588.4	0.047585	0.010547		588.4	0.06	0.394		383.4	0.538	0.142
588.6	0.047161	0.010426		588.6	0.06	0.39		383.6	0.542	0.142
588.8	0.046738	0.010324		588.8	0.059	0.386		383.8	0.545	0.143
589	0.046265	0.010227		589	0.058	0.383		384	0.548	0.144
589.2	0.045804	0.010118		589.2	0.058	0.378		384.2	0.552	0.144
589.4	0.045369	0.010024		589.4	0.057	0.374		384.4	0.555	0.145
589.6	0.044908	0.009929		589.6	0.057	0.371		384.6	0.559	0.146
589.8	0.044509	0.009838		589.8	0.056	0.367		384.8	0.562	0.147
590	0.044099	0.009741		590	0.056	0.363		385	0.565	0.147
590.2	0.0437	0.009625		590.2	0.055	0.36		385.2	0.569	0.148
590.4	0.043302	0.009536		590.4	0.055	0.356		385.4	0.571	0.149
590.6	0.042928	0.009438		590.6	0.054	0.352		385.6	0.575	0.15
590.8	0.042517	0.009353		590.8	0.054	0.349		385.8	0.578	0.15
591	0.042156	0.009283		591	0.053	0.345		386	0.581	0.151
591.2	0.041758	0.009191		591.2	0.053	0.342		386.2	0.585	0.152
591.4	0.041347	0.009101		591.4	0.052	0.339		386.4	0.588	0.152
591.6	0.040911	0.009008		591.6	0.052	0.335		386.6	0.591	0.153
591.8	0.040513	0.008921		591.8	0.051	0.332		386.8	0.595	0.154
592	0.040127	0.008832		592	0.051	0.328		387	0.598	0.155
592.2	0.039741	0.008748		592.2	0.05	0.325		387.2	0.602	0.155
592.4	0.039368	0.008667		592.4	0.05	0.322		387.4	0.605	0.156
592.6	0.039031	0.008582		592.6	0.049	0.319		387.6	0.608	0.157
592.8	0.03867	0.008501		592.8	0.049	0.315		387.8	0.612	0.157
593	0.038322	0.00843		593	0.048	0.312		388	0.615	0.158
593.2	0.037973	0.008338		593.2	0.048	0.309		388.2	0.618	0.159
593.4	0.0376	0.008252		593.4	0.047	0.306		388.4	0.622	0.159
593.6	0.037239	0.008172		593.6	0.047	0.303		388.6	0.625	0.16
593.8	0.036877	0.008101		593.8	0.046	0.3		388.8	0.629	0.161
594	0.036554	0.008028		594	0.046	0.297		389	0.632	0.162
594.2	0.036218	0.007959		594.2	0.046	0.294		389.2	0.635	0.162
594.4	0.035881	0.007893		594.4	0.045	0.291		389.4	0.639	0.163
594.6	0.035558	0.007822		594.6	0.045	0.289		389.6	0.642	0.164
594.8	0.035209	0.007751		594.8	0.044	0.286		389.8	0.645	0.165
595	0.034873	0.007682		595	0.044	0.283		390	0.648	0.165
595.2	0.0345	0.007621		595.2	0.044	0.281		390.2	0.652	0.166
595.4	0.034188	0.007542		595.4	0.043	0.278		390.4	0.655	0.167
595.6	0.033865	0.007471		595.6	0.043	0.275		390.6	0.659	0.167
595.8	0.033553	0.007393		595.8	0.042	0.273		390.8	0.662	0.168
596	0.033254	0.007329		596	0.042	0.27		391	0.666	0.169
596.2	0.032943	0.00725		596.2	0.042	0.267		391.2	0.67	0.17
596.4	0.032632	0.007186		596.4	0.041	0.265		391.4	0.673	0.17
596.6	0.032333	0.007114		596.6	0.041	0.262		391.6	0.676	0.171
596.8	0.032034	0.007052		596.8	0.04	0.26		391.8	0.68	0.172
597	0.031748	0.006983		597	0.04	0.258		392	0.683	0.172
597.2	0.031424	0.006922		597.2	0.04	0.255		392.2	0.686	0.173
597.4	0.031138	0.006865		597.4	0.039	0.253		392.4	0.69	0.174
597.6	0.030814	0.006793		597.6	0.039	0.25		392.6	0.693	0.174
597.8	0.03054	0.006733		597.8	0.039	0.248		392.8	0.696	0.175
598	0.030254	0.006678		598	0.038	0.246		393	0.699	0.176
598.2	0.029955	0.006616		598.2	0.038	0.243		393.2	0.703	0.176
598.4	0.029681	0.006554		598.4	0.038	0.241		393.4	0.706	0.177
598.6	0.029395	0.006494		598.6	0.037	0.239		393.6	0.709	0.178
598.8	0.029133	0.006434		598.8	0.037	0.237		393.8	0.713	0.178
599	0.028847	0.006377		599	0.037	0.235		394	0.716	0.179
599.2	0.028598	0.006315		599.2	0.036	0.232		394.2	0.72	0.18
599.4	0.028337	0.006259		599.4	0.036	0.23		394.4	0.723	0.181
599.6	0.028063	0.006196		599.6	0.036	0.228		394.6	0.726	0.181
599.8	0.027814	0.006152		599.8	0.035	0.226		394.8	0.729	0.182
600	0.027577	0.006098		600	0.035	0.224		395	0.732	0.183
								395.2	0.736	0.183
								395.4	0.739	0.184
								395.6	0.742	0.185
								395.8	0.745	0.185
								396	0.749	0.186
								396.2	0.752	0.187
								396.4	0.755	0.187
								396.6	0.758	0.188
								396.8	0.762	0.188
								397	0.765	0.189
								397.2	0.768	0.19
								397.4	0.771	0.19
								397.6	0.775	0.191
								397.8	0.778	0.191
								398	0.781	0.192
								398.2	0.784	0.193
								398.4	0.787	0.193
								398.6	0.79	0.194
								398.8	0.793	0.194
								399	0.796	0.195
								399.2	0.799	0.195
								399.4	0.802	0.196
								399.6	0.805	0.196
								399.8	0.808	0.197
								400	0.811	0.197
								400.2	0.814	0.198
								400.4	0.817	0.199
								400.6	0.82	0.199
								400.8	0.822	0.199
								401	0.825	0.2
								401.2	0.828	0.201
								401.4	0.831	0.201
								401.6	0.834	0.202
								401.8	0.837	0.202
								402	0.839	0.203
								402.2	0.842	0.203
								402.4	0.845	0.204
								402.6	0.848	0.204
								402.8	0.851	0.205
								403	0.854	0.205
								403.2	0.856	0.206
								403.4	0.859	0.206
								403.6	0.862	0.207
								403.8	0.865	0.207
								404	0.867	0.208
								404.2	0.87	0.208
								404.4	0.873	0.209
								404.6	0.875	0.209
								404.8	0.878	0.21
								405	0.88	0.21
								405.2	0.883	0.211
								405.4	0.886	0.211
								405.6	0.889	0.212
								405.8	0.891	0.212
								406	0.894	0.213
								406.2	0.897	0.213
								406.4	0.899	0.213
								406.6	0.901	0.214
								406.8	0.904	0.214
								407	0.906	0.215
								407.2	0.909	0.215
								407.4	0.911	0.216
								407.6	0.914	0.216
								407.8	0.917	0.217
								408	0.919	0.217
								408.2	0.921	0.217
								408.4	0.924	0.218
								408.6	0.926	0.218
								408.8	0.928	0.218
								409	0.93	0.219
								409.2	0.932	0.219
								409.4	0.935	0.219
								409.6	0.937	0.22
								409.8	0.939	0.22
								410	0.942	0.22
								410.2	0.944	0.221
								410.4	0.946	0.221
								410.6	0.948	0.221
								410.8	0.949	0.222
								411	0.951	0.222
								411.2	0.953	0.222
								411.4	0.955	0.222
								411.6	0.957	0.223
								411.8	0.959	0.223
								412	0.961	0.223
								412.2	0.962	0.223
								412.4	0.964	0.224
								412.6	0.965	0.224
								412.8	0.967	0.224
								413	0.968	0.224
								413.2	0.97	0.224
								413.4	0.971	0.225
								413.6	0.973	0.225
								413.8	0.974	0.225
								414	0.975	0.225
								414.2	0.977	0.225
								414.4	0.978	0.225
								414.6	0.979	0.226
								414.8	0.98	0.226
								415	0.982	0.226
								415.2	0.983	0.226
								415.4	0.984	0.226
								415.6	0.985	0.226
								415.8	0.985	0.226
								416	0.986	0.226
								416.2	0.987	0.227
								416.4	0.988	0.227
								416.6	0.989	0.227
								416.8	0.989	0.227
								417	0.99	0.227
								417.2	0.991	0.227
								417.4	0.992	0.227
								417.6	0.992	0.227
								417.8	0.993	0.227
								418	0.993	0.227
								418.2	0.994	0.227
								418.4	0.994	0.227
								418.6	0.995	0.228
								418.8	0.995	0.228
								419	0.996	0.228
								419.2	0.996	0.228
								419.4	0.997	0.228
								419.6	0.998	0.228
								419.8	0.998	0.229
								420	0.999	0.228
								420.2	0.999	0.229
								420.4	0.999	0.229
								420.6	0.999	0.229
								420.8	1	0.229
								421	1	0.229
								421.2	1	0.229
								421.4	1	0.229
								421.6	1	0.229
								421.8	1	0.23
								422	1	0.23
								422.2	1	0.23
								422.4	1	0.23
								422.6	1	0.23
								422.8	1	0.23
								423	1	0.23
								423.2	1	0.231
								423.4	0.999	0.231
								423.6	0.999	0.231
								423.8	0.999	0.231
								424	0.998	0.231
								424.2	0.998	0.231
								424.4	0.998	0.231
								424.6	0.997	0.231
								424.8	0.997	0.232
								425	0.997	0.232
								425.2	0.996	0.232
								425.4	0.996	0.232
								425.6	0.995	0.233
								425.8	0.995	0.233
								426	0.994	0.233
								426.2	0.994	0.233
								426.4	0.994	0.233
								426.6	0.993	0.234
								426.8	0.993	0.234
								427	0.992	0.234
								427.2	0.992	0.234
								427.4	0.991	0.235
								427.6	0.991	0.235
								427.8	0.991	0.235
								428	0.99	0.235
								428.2	0.989	0.236
								428.4	0.989	0.236
								428.6	0.988	0.236
								428.8	0.987	0.236
								429	0.987	0.236
								429.2	0.986	0.237
								429.4	0.985	0.237
								429.6	0.985	0.237
								429.8	0.984	0.237
								430	0.983	0.238
								430.2	0.982	0.238
								430.4	0.982	0.238
								430.6	0.981	0.238
								430.8	0.98	0.239
								431	0.979	0.239
								431.2	0.978	0.239
								431.4	0.977	0.24
								431.6	0.976	0.24
								431.8	0.975	0.24
								432	0.974	0.24
								432.2	0.973	0.241
								432.4	0.972	0.241
								432.6	0.971	0.241
								432.8	0.969	0.242
								433	0.968	0.242
								433.2	0.967	0.242
								433.4	0.966	0.243
								433.6	0.964	0.243
								433.8	0.963	0.243
								434	0.962	0.244
								434.2	0.96	0.244
								434.4	0.959	0.244
								434.6	0.957	0.245
								434.8	0.956	0.245
								435	0.954	0.245
								435.2	0.953	0.245
								435.4	0.951	0.246
								435.6	0.949	0.246
								435.8	0.947	0.246
								436	0.945	0.247
								436.2	0.943	0.247
								436.4	0.942	0.247
								436.6	0.94	0.248
								436.8	0.938	0.248
								437	0.936	0.248
								437.2	0.933	0.249
								437.4	0.931	0.249
								437.6	0.929	0.249
								437.8	0.927	0.249
								438	0.924	0.25
								438.2	0.921	0.25
								438.4	0.919	0.25
								438.6	0.916	0.25
								438.8	0.914	0.251
								439	0.911	0.251
								439.2	0.908	0.251
								439.4	0.905	0.252
								439.6	0.902	0.252
								439.8	0.899	0.253
								440	0.896	0.253
								440.2	0.893	0.253
								440.4	0.889	0.254
								440.6	0.886	0.254
								440.8	0.883	0.254
								441	0.879	0.254
								441.2	0.875	0.255
								441.4	0.872	0.255
								441.6	0.867	0.255
								441.8	0.863	0.256
								442	0.859	0.256
								442.2	0.855	0.256
								442.4	0.851	0.257
								442.6	0.847	0.257
								442.8	0.843	0.257
								443	0.838	0.258
								443.2	0.834	0.258
								443.4	0.829	0.259
								443.6	0.825	0.259
								443.8	0.82	0.259
								444	0.815	0.26
								444.2	0.81	0.26
								444.4	0.805	0.261
								444.6	0.8	0.261
								444.8	0.795	0.262
								445	0.79	0.262
								445.2	0.785	0.263
								445.4	0.78	0.263
								445.6	0.775	0.264
								445.8	0.769	0.264
								446	0.764	0.265
								446.2	0.759	0.265
								446.4	0.753	0.266
								446.6	0.748	0.266
								446.8	0.743	0.267
								447	0.737	0.267
								447.2	0.732	0.268
								447.4	0.727	0.269
								447.6	0.721	0.269
								447.8	0.716	0.27
								448	0.71	0.271
								448.2	0.705	0.272
								448.4	0.699	0.272
								448.6	0.693	0.273
								448.8	0.688	0.274
								449	0.682	0.275
								449.2	0.677	0.276
								449.4	0.671	0.276
								449.6	0.665	0.277
								449.8	0.66	0.278
								450	0.654	0.279
								450.2	0.649	0.28
								450.4	0.643	0.281
								450.6	0.638	0.282
								450.8	0.632	0.283
								451	0.627	0.284
								451.2	0.621	0.285
								451.4	0.616	0.286
								451.6	0.61	0.287
								451.8	0.605	0.289
								452	0.599	0.29
								452.2	0.594	0.291
								452.4	0.588	0.292
								452.6	0.583	0.294
								452.8	0.577	0.295
								453	0.571	0.296
								453.2	0.566	0.298
								453.4	0.56	0.299
								453.6	0.554	0.301
								453.8	0.548	0.302
								454	0.543	0.304
								454.2	0.537	0.305
								454.4	0.531	0.306
								454.6	0.526	0.308
								454.8	0.52	0.31
								455	0.514	0.311
								455.2	0.509	0.313
								455.4	0.503	0.315
								455.6	0.498	0.317
								455.8	0.492	0.318
								456	0.487	0.32
								456.2	0.482	0.322
								456.4	0.476	0.324
								456.6	0.471	0.326
								456.8	0.466	0.328
								457	0.461	0.33
								457.2	0.455	0.332
								457.4	0.45	0.334
								457.6	0.445	0.336
								457.8	0.44	0.338
								458	0.435	0.34
								458.2	0.43	0.343
								458.4	0.425	0.345
								458.6	0.42	0.348
								458.8	0.415	0.35
								459	0.41	0.353
								459.2	0.405	0.355
								459.4	0.401	0.358
								459.6	0.396	0.36
								459.8	0.391	0.363
								460	0.387	0.366
								460.2	0.382	0.368
								460.4	0.378	0.371
								460.6	0.374	0.374
								460.8	0.369	0.377
								461	0.365	0.379
								461.2	0.361	0.383
								461.4	0.357	0.385
								461.6	0.353	0.388
								461.8	0.348	0.391
								462	0.345	0.394
								462.2	0.341	0.397
								462.4	0.337	0.401
								462.6	0.333	0.403
								462.8	0.33	0.407
								463	0.326	0.41
								463.2	0.322	0.413
								463.4	0.319	0.417
								463.6	0.316	0.42
								463.8	0.312	0.423
								464	0.309	0.427
								464.2	0.306	0.43
								464.4	0.303	0.433
								464.6	0.3	0.437
								464.8	0.297	0.44
								465	0.294	0.443
								465.2	0.291	0.447
								465.4	0.288	0.45
								465.6	0.285	0.454
								465.8	0.282	0.457
								466	0.28	0.461
								466.2	0.277	0.464
								466.4	0.275	0.468
								466.6	0.272	0.471
								466.8	0.269	0.475
								467	0.267	0.478
								467.2	0.265	0.482
								467.4	0.263	0.486
								467.6	0.26	0.489
								467.8	0.258	0.493
								468	0.256	0.496
								468.2	0.254	0.5
								468.4	0.252	0.503
								468.6	0.25	0.507
								468.8	0.248	0.51
								469	0.246	0.514
								469.2	0.244	0.518
								469.4	0.242	0.521
								469.6	0.24	0.525
								469.8	0.238	0.528
								470	0.236	0.532
								470.2	0.235	0.535
								470.4	0.233	0.539
								470.6	0.231	0.542
								470.8	0.229	0.546
								471	0.228	0.549
								471.2	0.226	0.553
								471.4	0.225	0.556
								471.6	0.223	0.56
								471.8	0.222	0.563
								472	0.22	0.567
								472.2	0.218	0.571
								472.4	0.217	0.574
								472.6	0.216	0.577
								472.8	0.214	0.581
								473	0.213	0.584
								473.2	0.211	0.588
								473.4	0.21	0.591
								473.6	0.209	0.595
								473.8	0.207	0.598
								474	0.206	0.602
								474.2	0.205	0.605
								474.4	0.203	0.608
								474.6	0.202	0.612
								474.8	0.201	0.615
								475	0.2	0.619
								475.2	0.199	0.622
								475.4	0.198	0.625
								475.6	0.196	0.629
								475.8	0.195	0.632
								476	0.194	0.635
								476.2	0.193	0.639
								476.4	0.192	0.643
								476.6	0.191	0.646
								476.8	0.19	0.65
								477	0.189	0.653
								477.2	0.188	0.657
								477.4	0.187	0.661
								477.6	0.187	0.665
								477.8	0.186	0.668
								478	0.185	0.672
								478.2	0.184	0.676
								478.4	0.183	0.68
								478.6	0.183	0.684
								478.8	0.182	0.688
								479	0.182	0.692
								479.2	0.181	0.696
								479.4	0.18	0.701
								479.6	0.18	0.705
								479.8	0.179	0.709
								480	0.179	0.714
								480.2	0.178	0.718
								480.4	0.178	0.722
								480.6	0.177	0.726
								480.8	0.177	0.731
								481	0.176	0.735
								481.2	0.176	0.74
								481.4	0.176	0.744
								481.6	0.175	0.749
								481.8	0.175	0.753
								482	0.175	0.758
								482.2	0.174	0.762
								482.4	0.174	0.767
								482.6	0.174	0.771
								482.8	0.174	0.776
								483	0.174	0.781
								483.2	0.174	0.786
								483.4	0.173	0.791
								483.6	0.173	0.795
								483.8	0.173	0.8
								484	0.173	0.805
								484.2	0.173	0.811
								484.4	0.173	0.816
								484.6	0.173	0.821
								484.8	0.173	0.826
								485	0.173	0.831
								485.2	0.173	0.837
								485.4	0.173	0.842
								485.6	0.173	0.848
								485.8	0.173	0.853
								486	0.173	0.858
								486.2	0.173	0.864
								486.4	0.173	0.87
								486.6	0.173	0.875
								486.8	0.173	0.881
								487	0.173	0.887
								487.2	0.173	0.893
								487.4	0.173	0.899
								487.6	0.173	0.906
								487.8	0.174	0.912
								488	0.174	0.919
								488.2	0.174	0.925
								488.4	0.174	0.932
								488.6	0.175	0.938
								488.8	0.175	0.946
								489	0.175	0.952
								489.2	0.176	0.96
								489.4	0.176	0.967
								489.6	0.176	0.974
								489.8	0.177	0.981
								490	0.177	0.989
								490.2	0.178	0.996
								490.4	0.178	1.004
								490.6	0.179	1.011
								490.8	0.179	1.019
								491	0.18	1.027
								491.2	0.18	1.035
								491.4	0.181	1.043
								491.6	0.181	1.051
								491.8	0.182	1.059
								492	0.182	1.068
								492.2	0.183	1.076
								492.4	0.183	1.085
								492.6	0.184	1.093
								492.8	0.185	1.101
								493	0.185	1.11
								493.2	0.186	1.118
								493.4	0.187	1.127
								493.6	0.187	1.135
								493.8	0.188	1.144
								494	0.189	1.153
								494.2	0.189	1.162
								494.4	0.19	1.17
								494.6	0.191	1.179
								494.8	0.192	1.188
								495	0.192	1.197
								495.2	0.193	1.206
								495.4	0.194	1.214
								495.6	0.194	1.223
								495.8	0.195	1.233
								496	0.195	1.242
								496.2	0.196	1.25
								496.4	0.197	1.259
								496.6	0.197	1.268
								496.8	0.198	1.277
								497	0.199	1.286
								497.2	0.2	1.294
								497.4	0.2	1.303
								497.6	0.201	1.312
								497.8	0.202	1.32
								498	0.202	1.329
								498.2	0.203	1.337
								498.4	0.204	1.345
								498.6	0.204	1.354
								498.8	0.205	1.362
								499	0.206	1.37
								499.2	0.206	1.378
								499.4	0.207	1.386
								499.6	0.208	1.393
								499.8	0.208	1.401
								500	0.209	1.409
								500.2	0.209	1.416
								500.4	0.21	1.423
								500.6	0.211	1.43
								500.8	0.211	1.438
								501	0.212	1.444
								501.2	0.212	1.451
								501.4	0.212	1.457
								501.6	0.213	1.463
								501.8	0.213	1.469
								502	0.214	1.474
								502.2	0.214	1.48
								502.4	0.214	1.485
								502.6	0.215	1.49
								502.8	0.215	1.494
								503	0.215	1.499
								503.2	0.215	1.503
								503.4	0.215	1.507
								503.6	0.216	1.51
								503.8	0.216	1.513
								504	0.216	1.516
								504.2	0.216	1.518
								504.4	0.216	1.52
								504.6	0.216	1.522
								504.8	0.216	1.523
								505	0.215	1.524
								505.2	0.215	1.525
								505.4	0.215	1.525
								505.6	0.215	1.525
								505.8	0.214	1.525
								506	0.214	1.524
								506.2	0.214	1.523
								506.4	0.213	1.522
								506.6	0.213	1.52
								506.8	0.212	1.517
								507	0.211	1.514
								507.2	0.211	1.511
								507.4	0.21	1.508
								507.6	0.209	1.503
								507.8	0.208	1.499
								508	0.207	1.493
								508.2	0.207	1.488
								508.4	0.206	1.482
								508.6	0.205	1.476
								508.8	0.204	1.47
								509	0.202	1.463
								509.2	0.201	1.455
								509.4	0.2	1.448
								509.6	0.199	1.439
								509.8	0.198	1.431
								510	0.196	1.422
								510.2	0.195	1.413
								510.4	0.194	1.403
								510.6	0.192	1.393
								510.8	0.191	1.383
								511	0.189	1.373
								511.2	0.188	1.362
								511.4	0.186	1.351
								511.6	0.184	1.339
								511.8	0.183	1.328
								512	0.181	1.315
								512.2	0.179	1.303
								512.4	0.177	1.29
								512.6	0.176	1.278
								512.8	0.174	1.264
								513	0.172	1.251
								513.2	0.17	1.237
								513.4	0.168	1.224
								513.6	0.166	1.209
								513.8	0.164	1.196
								514	0.162	1.181
								514.2	0.16	1.166
								514.4	0.158	1.151
								514.6	0.156	1.137
								514.8	0.154	1.122
								515	0.153	1.107
[truncated: 111 more columns]

## Sheet: Supplementary Fig.2
Source data for Supplementary Fig.2a-g
Supplementary Fig.2a				Supplementary Fig.2b				Supplementary Fig.2c				Supplementary Fig.2d								Supplementary Fig.2e
Wavelength (nm)	CTL	Lactate		Wavelength (nm)	CTL	Lactate		Wavelength (nm)	CTL	Lactate		Temperature (℃)	CTL			Lactate				Concentration (μM)	Lactate			Glucose			PEP			Pyruvate			Citrate			Isocitrate			α-KG			Succinate			Fumarate			Malate
505	0.94	0.483		505	0.568	1.985		300	0.203	0.127		20	0.981	1	1.019	6.796	6.893	6.835		0	0.997	1.006	0.997	0.962	1.009	1.029	1.05	0.954	0.995	0.977	0.989	1.034	1.015	0.963	1.023	0.997	0.986	1.017	0.967	1.029	1.005	0.991	1.005	1.005	0.971	1.028	1.001	0.986	1.011
505.2	0.945	0.486		505.2	0.586	2.026		300.2	0.199	0.124		25	1.039	0.974	0.987	6.945	6.984	7.12		0.847	0.997	1.016	0.997
505.4	0.949	0.489		505.4	0.604	2.068		300.4	0.195	0.122		30	0.996	1.009	0.996	7.216	7.238	7.545		2.54	0.997	1.045	1.065
505.6	0.953	0.492		505.6	0.62	2.108		300.6	0.191	0.12		35	0.955	1.004	1.041	7.41	7.547	7.783		7.621	1.142	1.171	1.142
505.8	0.957	0.494		505.8	0.636	2.149		300.8	0.186	0.118		40	0.985	1.008	1.008	6.908	7.114	7.487		22.862	1.529	1.49	1.529
506	0.961	0.497		506	0.65	2.191		301	0.183	0.116										68.587	2.313	2.371	2.352
506.2	0.965	0.5		506.2	0.664	2.232		301.2	0.179	0.114										100				1.053	1.117	1.006	1.02	0.968	1.004	0.986	1	1.056	1.034	0.955	1.012	1.017	1.014	1.055	0.961	1.013	1.013	0.988	1.002	0.988	0.979	1.064	1.009	1.036	1.014
506.4	0.968	0.502		506.4	0.678	2.275		301.4	0.175	0.112										205.761	3.474	3.494	3.523
506.6	0.972	0.504		506.6	0.69	2.315		301.6	0.171	0.11										300				1.067	1.1	0.998	1.108	0.976	1.02	1.008	1.031	1.093	1.036	0.976	1.034	1.017	1.028	1.118	0.98	1.1	1.029	1.01	1.016	1.002	0.99	1.034	1.001	1.022	1.003
506.8	0.975	0.507		506.8	0.703	2.358		301.8	0.168	0.108										617.284	4.742	4.635	4.558
507	0.978	0.509		507	0.715	2.399		302	0.164	0.106										1000				0.993	1.026	0.965	1.036	0.987	1.015	1.054	1.099	1.144	1.077	1.031	1.088	1.024	1.048	1.114	0.975	1.018	0.999	0.996	1.013	1.013	0.998	1.108	1.02	1.036	1.019
507.2	0.981	0.511		507.2	0.727	2.44		302.2	0.161	0.104										1851.85	5.7	5.632	5.487
507.4	0.983	0.513		507.4	0.739	2.483		302.4	0.157	0.102										3000				1.015	1.045	1.001	1.017	1.001	1.006	1.149	1.18	1.228	1.194	1.137	1.199	1.076	1.125	1.156	1.005	1.04	1.026	1.037	1.035	1.016	0.993	1.012	1.001	1.047	1.039
507.6	0.986	0.515		507.6	0.75	2.527		302.6	0.154	0.101										5555.56	6.416	6.474	6.194
507.8	0.988	0.517		507.8	0.761	2.568		302.8	0.151	0.099										10000				0.965	1.031	1.004	1.02	1.009	1.004	1.197	1.239	1.27	1.297	1.251	1.33	1.097	1.127	1.032	1.075	1.081	1.075	1.01	1.007	1.01	1.004	1.012	0.982	1.091	1.075
508	0.99	0.518		508	0.772	2.611		303	0.148	0.098										16666.7	7.094	7.055	7.016
508.2	0.992	0.52		508.2	0.783	2.654		303.2	0.145	0.096										50000	7.984	7.926	7.761
508.4	0.994	0.522		508.4	0.792	2.696		303.4	0.142	0.095
508.6	0.995	0.523		508.6	0.802	2.737		303.6	0.139	0.093
508.8	0.996	0.525		508.8	0.812	2.779		303.8	0.137	0.092
509	0.997	0.526		509	0.821	2.821		304	0.134	0.091
509.2	0.998	0.527		509.2	0.831	2.863		304.2	0.132	0.089
509.4	0.999	0.528		509.4	0.84	2.903		304.4	0.129	0.088
509.6	1	0.529		509.6	0.848	2.945		304.6	0.127	0.087
509.8	1	0.53		509.8	0.858	2.986		304.8	0.124	0.085
510	1	0.531		510	0.866	3.026		305	0.122	0.084
510.2	1	0.531		510.2	0.875	3.065		305.2	0.12	0.083
510.4	1	0.532		510.4	0.884	3.105		305.4	0.118	0.082
510.6	0.999	0.532		510.6	0.892	3.144		305.6	0.116	0.081
510.8	0.999	0.533		510.8	0.9	3.182		305.8	0.114	0.08
511	0.998	0.533		511	0.907	3.219		306	0.112	0.079
511.2	0.997	0.533		511.2	0.914	3.257		306.2	0.11	0.077
511.4	0.996	0.533		511.4	0.922	3.294		306.4	0.108	0.076
511.6	0.995	0.533		511.6	0.927	3.329		306.6	0.106	0.075
511.8	0.993	0.533		511.8	0.934	3.363		306.8	0.105	0.074
512	0.992	0.533		512	0.94	3.398		307	0.103	0.073
512.2	0.99	0.533		512.2	0.945	3.432		307.2	0.102	0.072
512.4	0.988	0.532		512.4	0.951	3.464		307.4	0.1	0.071
512.6	0.987	0.532		512.6	0.956	3.493		307.6	0.098	0.071
512.8	0.984	0.532		512.8	0.962	3.523		307.8	0.097	0.07
513	0.982	0.531		513	0.967	3.552		308	0.095	0.069
513.2	0.98	0.53		513.2	0.972	3.58		308.2	0.094	0.068
513.4	0.977	0.53		513.4	0.976	3.606		308.4	0.093	0.067
513.6	0.975	0.529		513.6	0.98	3.632		308.6	0.091	0.067
513.8	0.972	0.528		513.8	0.983	3.658		308.8	0.09	0.066
514	0.969	0.527		514	0.987	3.681		309	0.089	0.065
514.2	0.966	0.526		514.2	0.989	3.703		309.2	0.088	0.064
514.4	0.963	0.525		514.4	0.992	3.724		309.4	0.087	0.064
514.6	0.96	0.524		514.6	0.993	3.745		309.6	0.086	0.063
514.8	0.956	0.523		514.8	0.995	3.763		309.8	0.085	0.062
515	0.953	0.522		515	0.996	3.781		310	0.083	0.062
515.2	0.949	0.52		515.2	0.998	3.798		310.2	0.083	0.061
515.4	0.945	0.519		515.4	0.999	3.814		310.4	0.081	0.06
515.6	0.941	0.518		515.6	0.999	3.828		310.6	0.081	0.06
515.8	0.937	0.516		515.8	1	3.841		310.8	0.079	0.059
516	0.933	0.514		516	1	3.852		311	0.079	0.059
516.2	0.929	0.513		516.2	1	3.864		311.2	0.078	0.058
516.4	0.925	0.511		516.4	1	3.873		311.4	0.077	0.057
516.6	0.92	0.51		516.6	0.999	3.882		311.6	0.076	0.057
516.8	0.916	0.508		516.8	0.999	3.889		311.8	0.075	0.056
517	0.911	0.506		517	0.997	3.895		312	0.074	0.056
517.2	0.907	0.504		517.2	0.995	3.899		312.2	0.074	0.055
517.4	0.902	0.502		517.4	0.993	3.903		312.4	0.073	0.055
517.6	0.897	0.5		517.6	0.991	3.905		312.6	0.072	0.055
517.8	0.892	0.498		517.8	0.989	3.905		312.8	0.071	0.054
518	0.888	0.496		518	0.987	3.905		313	0.071	0.054
518.2	0.883	0.494		518.2	0.984	3.903		313.2	0.07	0.053
518.4	0.878	0.492		518.4	0.981	3.899		313.4	0.069	0.053
518.6	0.873	0.49		518.6	0.978	3.895		313.6	0.069	0.053
518.8	0.868	0.488		518.8	0.975	3.889		313.8	0.068	0.052
519	0.863	0.485		519	0.972	3.882		314	0.068	0.052
519.2	0.857	0.483		519.2	0.969	3.875		314.2	0.067	0.052
519.4	0.852	0.481		519.4	0.965	3.867		314.4	0.067	0.051
519.6	0.847	0.478		519.6	0.961	3.858		314.6	0.066	0.051
519.8	0.841	0.476		519.8	0.957	3.848		314.8	0.066	0.051
520	0.836	0.473		520	0.953	3.839		315	0.065	0.051
520.2	0.831	0.471		520.2	0.948	3.827		315.2	0.065	0.05
520.4	0.825	0.468		520.4	0.945	3.815		315.4	0.064	0.05
520.6	0.82	0.466		520.6	0.94	3.802		315.6	0.064	0.05
520.8	0.815	0.463		520.8	0.935	3.788		315.8	0.064	0.049
521	0.809	0.461		521	0.93	3.773		316	0.063	0.049
521.2	0.804	0.458		521.2	0.926	3.759		316.2	0.063	0.049
521.4	0.798	0.455		521.4	0.922	3.742		316.4	0.063	0.049
521.6	0.793	0.453		521.6	0.917	3.725		316.6	0.062	0.049
521.8	0.787	0.45		521.8	0.912	3.708		316.8	0.062	0.048
522	0.782	0.447		522	0.908	3.691		317	0.062	0.048
522.2	0.776	0.445		522.2	0.903	3.672		317.2	0.061	0.048
522.4	0.771	0.442		522.4	0.897	3.653		317.4	0.061	0.048
522.6	0.765	0.439		522.6	0.892	3.634		317.6	0.061	0.048
522.8	0.76	0.436		522.8	0.887	3.616		317.8	0.061	0.047
523	0.755	0.434		523	0.882	3.594		318	0.06	0.047
523.2	0.749	0.431		523.2	0.876	3.574		318.2	0.06	0.047
523.4	0.743	0.428		523.4	0.871	3.553		318.4	0.06	0.047
523.6	0.738	0.425		523.6	0.866	3.533		318.6	0.06	0.046
523.8	0.733	0.423		523.8	0.86	3.511		318.8	0.06	0.046
524	0.728	0.42		524	0.855	3.488		319	0.059	0.046
524.2	0.722	0.417		524.2	0.85	3.466		319.2	0.059	0.046
524.4	0.717	0.414		524.4	0.845	3.445		319.4	0.059	0.045
524.6	0.712	0.411		524.6	0.84	3.422		319.6	0.059	0.045
524.8	0.707	0.408		524.8	0.835	3.398		319.8	0.059	0.045
525	0.702	0.405		525	0.83	3.375		320	0.059	0.045
525.2	0.697	0.403		525.2	0.826	3.352		320.2	0.059	0.045
525.4	0.692	0.4		525.4	0.82	3.328		320.4	0.059	0.044
525.6	0.687	0.397		525.6	0.815	3.304		320.6	0.059	0.044
525.8	0.682	0.394		525.8	0.81	3.28		320.8	0.059	0.044
526	0.677	0.392		526	0.805	3.257		321	0.058	0.044
526.2	0.672	0.389		526.2	0.8	3.232		321.2	0.058	0.043
526.4	0.667	0.386		526.4	0.795	3.208		321.4	0.058	0.043
526.6	0.662	0.383		526.6	0.789	3.182		321.6	0.058	0.043
526.8	0.658	0.38		526.8	0.784	3.159		321.8	0.058	0.043
527	0.653	0.378		527	0.78	3.134		322	0.058	0.042
527.2	0.648	0.375		527.2	0.774	3.109		322.2	0.058	0.042
527.4	0.643	0.372		527.4	0.769	3.084		322.4	0.058	0.042
527.6	0.639	0.37		527.6	0.764	3.06		322.6	0.058	0.042
527.8	0.634	0.367		527.8	0.759	3.035		322.8	0.058	0.041
528	0.63	0.364		528	0.753	3.01		323	0.058	0.041
528.2	0.625	0.362		528.2	0.748	2.985		323.2	0.057	0.041
528.4	0.621	0.359		528.4	0.743	2.962		323.4	0.057	0.041
528.6	0.617	0.356		528.6	0.738	2.938		323.6	0.057	0.04
528.8	0.612	0.354		528.8	0.733	2.913		323.8	0.057	0.04
529	0.608	0.351		529	0.727	2.888		324	0.057	0.04
529.2	0.604	0.349		529.2	0.722	2.864		324.2	0.057	0.04
529.4	0.6	0.346		529.4	0.717	2.839		324.4	0.056	0.039
529.6	0.596	0.344		529.6	0.711	2.814		324.6	0.056	0.039
529.8	0.592	0.341		529.8	0.707	2.788		324.8	0.056	0.039
530	0.588	0.339		530	0.702	2.763		325	0.056	0.039
530.2	0.584	0.336		530.2	0.697	2.738		325.2	0.056	0.038
530.4	0.58	0.334		530.4	0.692	2.712		325.4	0.056	0.038
530.6	0.577	0.332		530.6	0.686	2.687		325.6	0.055	0.038
530.8	0.573	0.33		530.8	0.682	2.662		325.8	0.055	0.038
531	0.569	0.327		531	0.677	2.637		326	0.055	0.038
531.2	0.566	0.325		531.2	0.671	2.611		326.2	0.055	0.037
531.4	0.562	0.323		531.4	0.666	2.586		326.4	0.055	0.037
531.6	0.558	0.32		531.6	0.661	2.562		326.6	0.055	0.037
531.8	0.555	0.318		531.8	0.656	2.537		326.8	0.054	0.037
532	0.551	0.316		532	0.65	2.512		327	0.054	0.037
532.2	0.547	0.314		532.2	0.645	2.488		327.2	0.054	0.036
532.4	0.544	0.312		532.4	0.64	2.466		327.4	0.054	0.036
532.6	0.541	0.31		532.6	0.634	2.442		327.6	0.054	0.036
532.8	0.537	0.308		532.8	0.629	2.419		327.8	0.053	0.036
533	0.534	0.305		533	0.624	2.397		328	0.053	0.036
533.2	0.531	0.303		533.2	0.618	2.374		328.2	0.053	0.036
533.4	0.528	0.301		533.4	0.613	2.352		328.4	0.053	0.036
533.6	0.525	0.299		533.6	0.608	2.329		328.6	0.053	0.036
533.8	0.521	0.297		533.8	0.602	2.307		328.8	0.053	0.036
534	0.518	0.295		534	0.597	2.286		329	0.053	0.035
534.2	0.515	0.293		534.2	0.593	2.265		329.2	0.053	0.035
534.4	0.512	0.291		534.4	0.587	2.244		329.4	0.053	0.035
534.6	0.509	0.29		534.6	0.582	2.223		329.6	0.052	0.035
534.8	0.506	0.288		534.8	0.577	2.203		329.8	0.052	0.035
535	0.503	0.286		535	0.572	2.182		330	0.052	0.035
535.2	0.5	0.284		535.2	0.566	2.163		330.2	0.052	0.035
535.4	0.497	0.282		535.4	0.561	2.142		330.4	0.052	0.036
535.6	0.494	0.28		535.6	0.556	2.124		330.6	0.052	0.035
535.8	0.491	0.279		535.8	0.551	2.105		330.8	0.052	0.035
536	0.488	0.277		536	0.546	2.086		331	0.052	0.036
536.2	0.486	0.275		536.2	0.541	2.068		331.2	0.052	0.036
536.4	0.483	0.273		536.4	0.536	2.05		331.4	0.052	0.036
536.6	0.48	0.271		536.6	0.531	2.033		331.6	0.052	0.036
536.8	0.477	0.27		536.8	0.527	2.015		331.8	0.052	0.036
537	0.474	0.268		537	0.523	1.999		332	0.052	0.036
537.2	0.471	0.266		537.2	0.518	1.983		332.2	0.052	0.036
537.4	0.469	0.264		537.4	0.515	1.967		332.4	0.052	0.036
537.6	0.466	0.263		537.6	0.51	1.952		332.6	0.053	0.037
537.8	0.463	0.261		537.8	0.506	1.937		332.8	0.053	0.037
538	0.46	0.259		538	0.502	1.923		333	0.053	0.037
538.2	0.458	0.258		538.2	0.498	1.908		333.2	0.053	0.037
538.4	0.455	0.256		538.4	0.494	1.895		333.4	0.053	0.037
538.6	0.452	0.254		538.6	0.49	1.882		333.6	0.053	0.037
538.8	0.45	0.253		538.8	0.486	1.869		333.8	0.054	0.038
539	0.447	0.251		539	0.483	1.857		334	0.054	0.038
539.2	0.444	0.25		539.2	0.479	1.844		334.2	0.054	0.038
539.4	0.442	0.248		539.4	0.475	1.834		334.4	0.054	0.038
539.6	0.439	0.247		539.6	0.472	1.821		334.6	0.054	0.039
539.8	0.437	0.245		539.8	0.468	1.81		334.8	0.055	0.039
540	0.434	0.243		540	0.465	1.799		335	0.055	0.039
540.2	0.431	0.242		540.2	0.461	1.788		335.2	0.055	0.039
540.4	0.429	0.241		540.4	0.459	1.778		335.4	0.055	0.04
540.6	0.426	0.239		540.6	0.456	1.767		335.6	0.056	0.04
540.8	0.424	0.238		540.8	0.452	1.757		335.8	0.056	0.04
541	0.421	0.236		541	0.449	1.747		336	0.056	0.041
541.2	0.419	0.235		541.2	0.447	1.737		336.2	0.057	0.041
541.4	0.416	0.233		541.4	0.444	1.728		336.4	0.057	0.041
541.6	0.414	0.232		541.6	0.442	1.718		336.6	0.058	0.042
541.8	0.412	0.23		541.8	0.439	1.709		336.8	0.058	0.042
542	0.409	0.229		542	0.436	1.7		337	0.059	0.042
542.2	0.407	0.227		542.2	0.434	1.69		337.2	0.059	0.043
542.4	0.404	0.226		542.4	0.431	1.682		337.4	0.059	0.043
542.6	0.402	0.225		542.6	0.429	1.674		337.6	0.06	0.043
542.8	0.4	0.223		542.8	0.427	1.665		337.8	0.061	0.043
543	0.397	0.222		543	0.424	1.656		338	0.061	0.044
543.2	0.395	0.221		543.2	0.422	1.648		338.2	0.062	0.044
543.4	0.393	0.219		543.4	0.419	1.64		338.4	0.063	0.044
543.6	0.39	0.218		543.6	0.417	1.632		338.6	0.063	0.045
543.8	0.388	0.217		543.8	0.415	1.624		338.8	0.064	0.045
544	0.386	0.216		544	0.412	1.616		339	0.065	0.045
544.2	0.384	0.214		544.2	0.41	1.609		339.2	0.065	0.046
544.4	0.381	0.213		544.4	0.408	1.601		339.4	0.066	0.046
544.6	0.379	0.212		544.6	0.406	1.593		339.6	0.067	0.046
544.8	0.377	0.21		544.8	0.404	1.585		339.8	0.067	0.046
545	0.375	0.209		545	0.402	1.578		340	0.068	0.046
545.2	0.373	0.208		545.2	0.4	1.57		340.2	0.069	0.047
545.4	0.37	0.207		545.4	0.399	1.563		340.4	0.07	0.047
545.6	0.368	0.206		545.6	0.397	1.555		340.6	0.07	0.047
545.8	0.366	0.204		545.8	0.395	1.548		340.8	0.071	0.048
546	0.364	0.203		546	0.393	1.54		341	0.072	0.048
546.2	0.362	0.202		546.2	0.391	1.533		341.2	0.073	0.048
546.4	0.36	0.201		546.4	0.389	1.525		341.4	0.074	0.049
546.6	0.358	0.199		546.6	0.387	1.518		341.6	0.074	0.049
546.8	0.355	0.198		546.8	0.385	1.51		341.8	0.075	0.049
547	0.353	0.197		547	0.383	1.503		342	0.076	0.05
547.2	0.351	0.196		547.2	0.382	1.496		342.2	0.077	0.05
547.4	0.349	0.195		547.4	0.379	1.489		342.4	0.078	0.05
547.6	0.347	0.193		547.6	0.378	1.482		342.6	0.079	0.051
547.8	0.345	0.192		547.8	0.376	1.475		342.8	0.08	0.051
548	0.343	0.191		548	0.374	1.467		343	0.08	0.051
548.2	0.34	0.19		548.2	0.371	1.46		343.2	0.082	0.051
548.4	0.338	0.189		548.4	0.369	1.453		343.4	0.082	0.052
548.6	0.336	0.188		548.6	0.367	1.445		343.6	0.083	0.052
548.8	0.334	0.187		548.8	0.365	1.438		343.8	0.084	0.052
549	0.332	0.185		549	0.363	1.43		344	0.085	0.053
549.2	0.33	0.184		549.2	0.36	1.423		344.2	0.087	0.053
549.4	0.328	0.183		549.4	0.358	1.416		344.4	0.088	0.053
549.6	0.325	0.182		549.6	0.356	1.409		344.6	0.089	0.054
549.8	0.323	0.181		549.8	0.354	1.403		344.8	0.09	0.054
550	0.321	0.18		550	0.352	1.395		345	0.091	0.054
550.2	0.319	0.179		550.2	0.351	1.389		345.2	0.092	0.055
550.4	0.317	0.178		550.4	0.349	1.382		345.4	0.093	0.055
550.6	0.314	0.176		550.6	0.347	1.375		345.6	0.094	0.056
550.8	0.312	0.175		550.8	0.345	1.368		345.8	0.095	0.056
551	0.31	0.174		551	0.343	1.361		346	0.097	0.057
551.2	0.308	0.173		551.2	0.341	1.355		346.2	0.098	0.057
551.4	0.306	0.172		551.4	0.339	1.348		346.4	0.099	0.058
551.6	0.304	0.171		551.6	0.337	1.342		346.6	0.1	0.058
551.8	0.302	0.17		551.8	0.336	1.334		346.8	0.101	0.059
552	0.299	0.169		552	0.333	1.328		347	0.103	0.059
552.2	0.297	0.168		552.2	0.331	1.321		347.2	0.104	0.06
552.4	0.295	0.167		552.4	0.329	1.315		347.4	0.105	0.061
552.6	0.293	0.166		552.6	0.328	1.307		347.6	0.106	0.061
552.8	0.291	0.165		552.8	0.326	1.301		347.8	0.108	0.062
553	0.288	0.164		553	0.324	1.295		348	0.109	0.062
553.2	0.286	0.163		553.2	0.323	1.289		348.2	0.11	0.063
553.4	0.284	0.161		553.4	0.32	1.282		348.4	0.112	0.064
553.6	0.282	0.16		553.6	0.319	1.275		348.6	0.113	0.064
553.8	0.28	0.159		553.8	0.317	1.268		348.8	0.114	0.065
554	0.278	0.158		554	0.315	1.262		349	0.116	0.066
554.2	0.275	0.157		554.2	0.313	1.255		349.2	0.117	0.067
554.4	0.273	0.156		554.4	0.311	1.249		349.4	0.119	0.068
554.6	0.271	0.155		554.6	0.309	1.243		349.6	0.12	0.068
554.8	0.269	0.154		554.8	0.307	1.236		349.8	0.121	0.069
555	0.267	0.153		555	0.305	1.23		350	0.123	0.07
555.2	0.265	0.152		555.2	0.303	1.225		350.2	0.124	0.071
555.4	0.263	0.151		555.4	0.302	1.219		350.4	0.126	0.072
555.6	0.261	0.15		555.6	0.299	1.212		350.6	0.127	0.073
555.8	0.259	0.149		555.8	0.297	1.206		350.8	0.129	0.074
556	0.256	0.148		556	0.295	1.2		351	0.13	0.075
556.2	0.254	0.147		556.2	0.294	1.194		351.2	0.132	0.076
556.4	0.252	0.146		556.4	0.292	1.188		351.4	0.133	0.077
556.6	0.25	0.145		556.6	0.291	1.181		351.6	0.135	0.078
556.8	0.248	0.144		556.8	0.289	1.174		351.8	0.136	0.079
557	0.247	0.143		557	0.286	1.168		352	0.138	0.08
557.2	0.245	0.142		557.2	0.286	1.161		352.2	0.139	0.081
557.4	0.243	0.14		557.4	0.283	1.155		352.4	0.141	0.082
557.6	0.241	0.139		557.6	0.282	1.148		352.6	0.142	0.083
557.8	0.239	0.138		557.8	0.281	1.142		352.8	0.144	0.083
558	0.237	0.137		558	0.278	1.135		353	0.145	0.084
558.2	0.235	0.136		558.2	0.278	1.129		353.2	0.147	0.085
558.4	0.233	0.135		558.4	0.275	1.123		353.4	0.148	0.086
558.6	0.231	0.134		558.6	0.274	1.116		353.6	0.15	0.087
558.8	0.23	0.133		558.8	0.272	1.11		353.8	0.151	0.088
559	0.228	0.132		559	0.27	1.103		354	0.152	0.089
559.2	0.226	0.131		559.2	0.269	1.097		354.2	0.154	0.09
559.4	0.224	0.13		559.4	0.267	1.09		354.4	0.155	0.091
559.6	0.222	0.129		559.6	0.265	1.083		354.6	0.156	0.092
559.8	0.221	0.128		559.8	0.264	1.076		354.8	0.158	0.093
560	0.219	0.127		560	0.262	1.07		355	0.159	0.094
560.2	0.217	0.126		560.2	0.26	1.063		355.2	0.161	0.095
560.4	0.216	0.125		560.4	0.259	1.057		355.4	0.162	0.096
560.6	0.214	0.124		560.6	0.257	1.05		355.6	0.163	0.097
560.8	0.212	0.123		560.8	0.255	1.043		355.8	0.165	0.097
561	0.211	0.122		561	0.254	1.036		356	0.166	0.098
561.2	0.209	0.121		561.2	0.252	1.029		356.2	0.167	0.099
561.4	0.208	0.12		561.4	0.251	1.023		356.4	0.169	0.1
561.6	0.206	0.119		561.6	0.249	1.015		356.6	0.17	0.101
561.8	0.205	0.118		561.8	0.248	1.008		356.8	0.172	0.101
562	0.203	0.117		562	0.246	1.001		357	0.173	0.102
562.2	0.202	0.116		562.2	0.245	0.993		357.2	0.174	0.103
562.4	0.2	0.115		562.4	0.243	0.985		357.4	0.176	0.104
562.6	0.199	0.114		562.6	0.241	0.977		357.6	0.177	0.104
562.8	0.197	0.113		562.8	0.239	0.97		357.8	0.178	0.105
563	0.196	0.113		563	0.238	0.963		358	0.18	0.106
563.2	0.194	0.112		563.2	0.236	0.956		358.2	0.181	0.106
563.4	0.193	0.111		563.4	0.235	0.948		358.4	0.183	0.107
563.6	0.191	0.11		563.6	0.233	0.94		358.6	0.184	0.108
563.8	0.19	0.109		563.8	0.231	0.933		358.8	0.185	0.108
564	0.189	0.108		564	0.23	0.926		359	0.187	0.109
564.2	0.187	0.107		564.2	0.228	0.919		359.2	0.188	0.11
564.4	0.186	0.106		564.4	0.226	0.911		359.4	0.189	0.111
564.6	0.184	0.106		564.6	0.225	0.904		359.6	0.191	0.111
564.8	0.183	0.105		564.8	0.223	0.897		359.8	0.192	0.112
565	0.181	0.104		565	0.221	0.889		360	0.193	0.113
565.2	0.18	0.103		565.2	0.219	0.882		360.2	0.195	0.113
565.4	0.179	0.102		565.4	0.217	0.874		360.4	0.196	0.114
565.6	0.177	0.102		565.6	0.216	0.867		360.6	0.198	0.115
565.8	0.176	0.101		565.8	0.214	0.86		360.8	0.199	0.115
566	0.175	0.1		566	0.213	0.853		361	0.201	0.116
566.2	0.173	0.099		566.2	0.211	0.846		361.2	0.202	0.117
566.4	0.172	0.099		566.4	0.209	0.839		361.4	0.204	0.117
566.6	0.171	0.098		566.6	0.207	0.831		361.6	0.205	0.118
566.8	0.169	0.097		566.8	0.206	0.824		361.8	0.207	0.119
567	0.168	0.097		567	0.203	0.817		362	0.209	0.119
567.2	0.167	0.096		567.2	0.202	0.809		362.2	0.211	0.12
567.4	0.165	0.095		567.4	0.2	0.802		362.4	0.213	0.121
567.6	0.164	0.094		567.6	0.198	0.794		362.6	0.215	0.122
567.8	0.163	0.094		567.8	0.196	0.787		362.8	0.216	0.123
568	0.162	0.093		568	0.195	0.779		363	0.218	0.123
568.2	0.16	0.092		568.2	0.193	0.772		363.2	0.22	0.125
568.4	0.159	0.092		568.4	0.191	0.765		363.4	0.222	0.125
568.6	0.158	0.091		568.6	0.19	0.757		363.6	0.224	0.126
568.8	0.156	0.09		568.8	0.188	0.75		363.8	0.226	0.127
569	0.155	0.09		569	0.186	0.743		364	0.229	0.128
569.2	0.154	0.089		569.2	0.185	0.735		364.2	0.231	0.129
569.4	0.153	0.088		569.4	0.183	0.729		364.4	0.233	0.13
569.6	0.151	0.088		569.6	0.182	0.721		364.6	0.235	0.131
569.8	0.15	0.087		569.8	0.18	0.714		364.8	0.238	0.133
570	0.149	0.087		570	0.178	0.707		365	0.24	0.134
570.2	0.148	0.086		570.2	0.177	0.701		365.2	0.243	0.135
570.4	0.147	0.085		570.4	0.175	0.695		365.4	0.245	0.136
570.6	0.145	0.084		570.6	0.173	0.687		365.6	0.248	0.138
570.8	0.144	0.084		570.8	0.172	0.681		365.8	0.25	0.139
571	0.143	0.083		571	0.17	0.674		366	0.253	0.14
571.2	0.142	0.083		571.2	0.169	0.667		366.2	0.256	0.141
571.4	0.141	0.082		571.4	0.168	0.661		366.4	0.258	0.143
571.6	0.14	0.081		571.6	0.167	0.654		366.6	0.261	0.144
571.8	0.138	0.081		571.8	0.166	0.648		366.8	0.264	0.145
572	0.137	0.08		572	0.164	0.641		367	0.267	0.147
572.2	0.136	0.079		572.2	0.164	0.635		367.2	0.27	0.148
572.4	0.135	0.079		572.4	0.162	0.628		367.4	0.273	0.149
572.6	0.134	0.078		572.6	0.161	0.622		367.6	0.276	0.151
572.8	0.133	0.077		572.8	0.16	0.616		367.8	0.279	0.152
573	0.132	0.077		573	0.158	0.61		368	0.282	0.154
573.2	0.131	0.076		573.2	0.158	0.604		368.2	0.285	0.155
573.4	0.129	0.075		573.4	0.156	0.597		368.4	0.288	0.157
573.6	0.128	0.075		573.6	0.156	0.592		368.6	0.292	0.158
573.8	0.127	0.074		573.8	0.154	0.585		368.8	0.295	0.16
574	0.126	0.074		574	0.153	0.579		369	0.298	0.162
574.2	0.125	0.073		574.2	0.153	0.573		369.2	0.301	0.163
574.4	0.124	0.072		574.4	0.151	0.568		369.4	0.304	0.165
574.6	0.123	0.072		574.6	0.15	0.56		369.6	0.308	0.166
574.8	0.122	0.071		574.8	0.15	0.555		369.8	0.311	0.168
575	0.122	0.07		575	0.149	0.549		370	0.315	0.17
575.2	0.121	0.07		575.2	0.148	0.544		370.2	0.318	0.171
575.4	0.12	0.069		575.4	0.148	0.537		370.4	0.321	0.173
575.6	0.119	0.068		575.6	0.146	0.532		370.6	0.325	0.175
575.8	0.118	0.068		575.8	0.145	0.525		370.8	0.328	0.176
576	0.117	0.067		576	0.144	0.52		371	0.332	0.178
576.2	0.116	0.067		576.2	0.143	0.515		371.2	0.335	0.179
576.4	0.115	0.066		576.4	0.142	0.509		371.4	0.339	0.181
576.6	0.114	0.065		576.6	0.142	0.504		371.6	0.342	0.182
576.8	0.113	0.065		576.8	0.141	0.499		371.8	0.345	0.184
577	0.112	0.064		577	0.14	0.493		372	0.349	0.185
577.2	0.111	0.064		577.2	0.14	0.488		372.2	0.352	0.187
577.4	0.11	0.063		577.4	0.139	0.484		372.4	0.355	0.188
577.6	0.109	0.063		577.6	0.139	0.478		372.6	0.358	0.19
577.8	0.108	0.062		577.8	0.138	0.474		372.8	0.361	0.191
578	0.108	0.062		578	0.137	0.469		373	0.365	0.193
578.2	0.107	0.061		578.2	0.137	0.465		373.2	0.368	0.194
578.4	0.106	0.061		578.4	0.135	0.461		373.4	0.371	0.195
578.6	0.105	0.06		578.6	0.134	0.456		373.6	0.374	0.197
578.8	0.104	0.06		578.8	0.134	0.453		373.8	0.377	0.198
579	0.103	0.059		579	0.133	0.448		374	0.381	0.199
579.2	0.103	0.059		579.2	0.132	0.445		374.2	0.383	0.201
579.4	0.102	0.058		579.4	0.13	0.44		374.4	0.387	0.202
579.6	0.101	0.058		579.6	0.129	0.437		374.6	0.39	0.203
579.8	0.1	0.057		579.8	0.128	0.433		374.8	0.393	0.205
580	0.1	0.057		580	0.127	0.43		375	0.396	0.206
580.2	0.099	0.056		580.2	0.126	0.427		375.2	0.399	0.207
580.4	0.098	0.056		580.4	0.126	0.423		375.4	0.402	0.209
580.6	0.097	0.055		580.6	0.125	0.42		375.6	0.406	0.21
580.8	0.096	0.055		580.8	0.124	0.417		375.8	0.409	0.211
581	0.096	0.055		581	0.123	0.414		376	0.412	0.212
581.2	0.095	0.054		581.2	0.121	0.412		376.2	0.415	0.214
581.4	0.094	0.054		581.4	0.121	0.409		376.4	0.419	0.215
581.6	0.093	0.054		581.6	0.12	0.406		376.6	0.422	0.216
581.8	0.093	0.053		581.8	0.118	0.405		376.8	0.425	0.217
582	0.092	0.053		582	0.118	0.402		377	0.429	0.219
582.2	0.091	0.052		582.2	0.116	0.4		377.2	0.432	0.22
582.4	0.09	0.052		582.4	0.115	0.397		377.4	0.435	0.221
582.6	0.09	0.052		582.6	0.113	0.394		377.6	0.438	0.222
582.8	0.089	0.051		582.8	0.113	0.392		377.8	0.441	0.223
583	0.088	0.051		583	0.112	0.39		378	0.444	0.225
583.2	0.088	0.051		583.2	0.11	0.387		378.2	0.447	0.226
583.4	0.087	0.05		583.4	0.11	0.385		378.4	0.451	0.227
583.6	0.086	0.05		583.6	0.109	0.384		378.6	0.454	0.228
583.8	0.086	0.05		583.8	0.108	0.382		378.8	0.457	0.23
584	0.085	0.049		584	0.107	0.38		379	0.46	0.231
584.2	0.084	0.049		584.2	0.106	0.378		379.2	0.463	0.232
584.4	0.084	0.049		584.4	0.105	0.376		379.4	0.466	0.234
584.6	0.083	0.048		584.6	0.105	0.374		379.6	0.469	0.235
584.8	0.083	0.048		584.8	0.104	0.373		379.8	0.472	0.236
585	0.082	0.048		585	0.103	0.371		380	0.475	0.237
585.2	0.081	0.048		585.2	0.102	0.369		380.2	0.478	0.239
585.4	0.081	0.047		585.4	0.101	0.368		380.4	0.482	0.24
585.6	0.08	0.047		585.6	0.1	0.366		380.6	0.485	0.241
585.8	0.079	0.047		585.8	0.099	0.364		380.8	0.488	0.243
586	0.079	0.046		586	0.099	0.362		381	0.491	0.244
586.2	0.078	0.046		586.2	0.098	0.36		381.2	0.495	0.245
586.4	0.078	0.046		586.4	0.097	0.358		381.4	0.498	0.247
586.6	0.077	0.045		586.6	0.096	0.357		381.6	0.501	0.248
586.8	0.076	0.045		586.8	0.094	0.355		381.8	0.505	0.249
587	0.076	0.045		587	0.094	0.352		382	0.508	0.251
587.2	0.075	0.045		587.2	0.093	0.351		382.2	0.512	0.252
587.4	0.075	0.044		587.4	0.092	0.348		382.4	0.516	0.253
587.6	0.074	0.044		587.6	0.092	0.347		382.6	0.519	0.255
587.8	0.074	0.044		587.8	0.091	0.344		382.8	0.523	0.256
588	0.073	0.043		588	0.089	0.342		383	0.527	0.258
588.2	0.073	0.043		588.2	0.089	0.34		383.2	0.53	0.26
588.4	0.072	0.043		588.4	0.089	0.337		383.4	0.534	0.261
588.6	0.072	0.043		588.6	0.089	0.335		383.6	0.537	0.263
588.8	0.071	0.042		588.8	0.088	0.333		383.8	0.541	0.264
589	0.071	0.042		589	0.088	0.331		384	0.545	0.266
589.2	0.07	0.042		589.2	0.086	0.328		384.2	0.548	0.267
589.4	0.069	0.042		589.4	0.086	0.326		384.4	0.552	0.269
589.6	0.069	0.041		589.6	0.086	0.323		384.6	0.556	0.271
589.8	0.068	0.041		589.8	0.086	0.321		384.8	0.56	0.272
590	0.068	0.041		590	0.084	0.319		385	0.563	0.274
590.2	0.067	0.04		590.2	0.084	0.316		385.2	0.567	0.275
590.4	0.067	0.04		590.4	0.084	0.314		385.4	0.571	0.277
590.6	0.067	0.04		590.6	0.084	0.313		385.6	0.575	0.279
590.8	0.066	0.04		590.8	0.082	0.309		385.8	0.579	0.28
591	0.066	0.039		591	0.082	0.307		386	0.582	0.282
591.2	0.065	0.039		591.2	0.082	0.305		386.2	0.586	0.283
591.4	0.065	0.039		591.4	0.081	0.302		386.4	0.59	0.285
591.6	0.064	0.038		591.6	0.081	0.3		386.6	0.594	0.286
591.8	0.064	0.038		591.8	0.08	0.298		386.8	0.598	0.288
592	0.063	0.038		592	0.08	0.296		387	0.601	0.289
592.2	0.063	0.038		592.2	0.08	0.293		387.2	0.605	0.291
592.4	0.062	0.037		592.4	0.079	0.291		387.4	0.609	0.292
592.6	0.062	0.037		592.6	0.079	0.288		387.6	0.613	0.294
592.8	0.062	0.037		592.8	0.079	0.286		387.8	0.616	0.295
593	0.061	0.037		593	0.078	0.283		388	0.62	0.297
593.2	0.061	0.036		593.2	0.078	0.281		388.2	0.624	0.299
593.4	0.06	0.036		593.4	0.078	0.278		388.4	0.628	0.3
593.6	0.06	0.036		593.6	0.078	0.275		388.6	0.631	0.302
593.8	0.06	0.035		593.8	0.078	0.273		388.8	0.635	0.303
594	0.059	0.035		594	0.078	0.271		389	0.639	0.304
594.2	0.059	0.035		594.2	0.078	0.268		389.2	0.642	0.306
594.4	0.058	0.035		594.4	0.078	0.266		389.4	0.646	0.307
594.6	0.058	0.034		594.6	0.076	0.264		389.6	0.649	0.309
594.8	0.058	0.034		594.8	0.076	0.262		389.8	0.652	0.31
595	0.057	0.034		595	0.076	0.259		390	0.656	0.311
595.2	0.057	0.034		595.2	0.076	0.257		390.2	0.659	0.313
595.4	0.057	0.033		595.4	0.076	0.255		390.4	0.663	0.314
595.6	0.056	0.033		595.6	0.074	0.253		390.6	0.666	0.315
595.8	0.056	0.033		595.8	0.074	0.251		390.8	0.67	0.317
596	0.056	0.033		596	0.074	0.249		391	0.673	0.318
596.2	0.055	0.032		596.2	0.073	0.248		391.2	0.676	0.319
596.4	0.055	0.032		596.4	0.073	0.246		391.4	0.68	0.321
596.6	0.055	0.032		596.6	0.073	0.245		391.6	0.683	0.322
596.8	0.054	0.032		596.8	0.073	0.243		391.8	0.686	0.323
597	0.054	0.031		597	0.073	0.242		392	0.689	0.325
597.2	0.054	0.031		597.2	0.071	0.241		392.2	0.693	0.326
597.4	0.053	0.031		597.4	0.071	0.239		392.4	0.696	0.327
597.6	0.053	0.031		597.6	0.07	0.238		392.6	0.7	0.328
597.8	0.053	0.031		597.8	0.07	0.236		392.8	0.703	0.33
598	0.052	0.03		598	0.07	0.235		393	0.706	0.331
598.2	0.052	0.03		598.2	0.07	0.233		393.2	0.71	0.332
598.4	0.051	0.03		598.4	0.069	0.233		393.4	0.713	0.334
598.6	0.051	0.03		598.6	0.069	0.231		393.6	0.716	0.335
598.8	0.051	0.03		598.8	0.068	0.23		393.8	0.72	0.336
599	0.05	0.029		599	0.068	0.229		394	0.723	0.337
599.2	0.05	0.029		599.2	0.067	0.227		394.2	0.726	0.339
599.4	0.05	0.029		599.4	0.066	0.226		394.4	0.73	0.34
599.6	0.049	0.029		599.6	0.065	0.225		394.6	0.733	0.341
599.8	0.049	0.028		599.8	0.065	0.224		394.8	0.736	0.342
600	0.049	0.028		600	0.065	0.223		395	0.74	0.344
								395.2	0.743	0.345
								395.4	0.746	0.346
								395.6	0.749	0.347
								395.8	0.752	0.349
								396	0.755	0.35
								396.2	0.758	0.351
								396.4	0.761	0.353
								396.6	0.764	0.354
								396.8	0.767	0.355
								397	0.77	0.357
								397.2	0.773	0.358
								397.4	0.776	0.359
								397.6	0.779	0.361
								397.8	0.782	0.362
								398	0.785	0.363
								398.2	0.788	0.365
								398.4	0.791	0.366
								398.6	0.793	0.367
								398.8	0.797	0.368
								399	0.8	0.369
								399.2	0.803	0.371
								399.4	0.806	0.372
								399.6	0.809	0.373
								399.8	0.812	0.374
								400	0.815	0.376
								400.2	0.818	0.377
								400.4	0.821	0.378
								400.6	0.824	0.38
								400.8	0.827	0.381
								401	0.83	0.382
								401.2	0.833	0.383
								401.4	0.836	0.385
								401.6	0.839	0.386
								401.8	0.842	0.387
								402	0.845	0.389
								402.2	0.848	0.39
								402.4	0.851	0.391
								402.6	0.854	0.393
								402.8	0.857	0.394
								403	0.86	0.395
								403.2	0.863	0.396
								403.4	0.866	0.397
								403.6	0.869	0.398
								403.8	0.872	0.399
								404	0.875	0.4
								404.2	0.878	0.401
								404.4	0.881	0.402
								404.6	0.884	0.403
								404.8	0.887	0.404
								405	0.89	0.405
								405.2	0.893	0.406
								405.4	0.896	0.407
								405.6	0.899	0.407
								405.8	0.902	0.408
								406	0.905	0.409
								406.2	0.908	0.41
								406.4	0.911	0.411
								406.6	0.914	0.411
								406.8	0.917	0.412
								407	0.919	0.412
								407.2	0.922	0.413
								407.4	0.925	0.414
								407.6	0.928	0.414
								407.8	0.93	0.415
								408	0.933	0.415
								408.2	0.936	0.416
								408.4	0.939	0.416
								408.6	0.941	0.417
								408.8	0.944	0.417
								409	0.946	0.417
								409.2	0.949	0.418
								409.4	0.951	0.418
								409.6	0.954	0.419
								409.8	0.956	0.419
								410	0.959	0.419
								410.2	0.961	0.42
								410.4	0.964	0.42
								410.6	0.966	0.421
								410.8	0.968	0.421
								411	0.97	0.421
								411.2	0.972	0.422
								411.4	0.974	0.422
								411.6	0.976	0.422
								411.8	0.978	0.423
								412	0.98	0.423
								412.2	0.981	0.423
								412.4	0.983	0.424
								412.6	0.985	0.424
								412.8	0.986	0.424
								413	0.988	0.424
								413.2	0.989	0.424
								413.4	0.99	0.424
								413.6	0.992	0.425
								413.8	0.993	0.425
								414	0.994	0.425
								414.2	0.995	0.425
								414.4	0.996	0.426
								414.6	0.997	0.426
								414.8	0.998	0.426
								415	0.998	0.426
								415.2	0.999	0.426
								415.4	0.999	0.426
								415.6	0.999	0.426
								415.8	1	0.426
								416	1	0.426
								416.2	1	0.426
								416.4	1	0.426
								416.6	1	0.426
								416.8	1	0.426
								417	1	0.426
								417.2	0.999	0.425
								417.4	0.999	0.425
								417.6	0.998	0.425
								417.8	0.998	0.424
								418	0.997	0.424
								418.2	0.997	0.423
								418.4	0.996	0.423
								418.6	0.995	0.422
								418.8	0.994	0.422
								419	0.993	0.421
								419.2	0.992	0.421
								419.4	0.991	0.42
								419.6	0.989	0.42
								419.8	0.988	0.419
								420	0.987	0.418
								420.2	0.985	0.417
								420.4	0.983	0.417
								420.6	0.981	0.416
								420.8	0.979	0.415
								421	0.977	0.414
								421.2	0.975	0.413
								421.4	0.973	0.411
								421.6	0.971	0.41
								421.8	0.969	0.409
								422	0.967	0.408
								422.2	0.965	0.406
								422.4	0.963	0.405
								422.6	0.96	0.404
								422.8	0.958	0.403
								423	0.956	0.401
								423.2	0.953	0.4
								423.4	0.95	0.398
								423.6	0.948	0.397
								423.8	0.945	0.396
								424	0.943	0.394
								424.2	0.94	0.393
								424.4	0.937	0.391
								424.6	0.934	0.39
								424.8	0.931	0.388
								425	0.929	0.387
								425.2	0.926	0.385
								425.4	0.923	0.383
								425.6	0.92	0.382
								425.8	0.917	0.38
								426	0.915	0.378
								426.2	0.912	0.377
								426.4	0.909	0.375
								426.6	0.906	0.374
								426.8	0.904	0.372
								427	0.901	0.37
								427.2	0.899	0.369
								427.4	0.896	0.367
								427.6	0.893	0.366
								427.8	0.891	0.364
								428	0.888	0.362
								428.2	0.885	0.361
								428.4	0.882	0.359
								428.6	0.88	0.358
								428.8	0.877	0.356
								429	0.874	0.355
								429.2	0.871	0.353
								429.4	0.869	0.351
								429.6	0.866	0.35
								429.8	0.863	0.348
								430	0.861	0.347
								430.2	0.858	0.345
								430.4	0.855	0.344
								430.6	0.853	0.342
								430.8	0.85	0.341
								431	0.847	0.339
								431.2	0.844	0.338
								431.4	0.842	0.337
								431.6	0.839	0.335
								431.8	0.836	0.334
								432	0.833	0.332
								432.2	0.83	0.331
								432.4	0.827	0.329
								432.6	0.824	0.328
								432.8	0.821	0.326
								433	0.818	0.325
								433.2	0.815	0.324
								433.4	0.812	0.322
								433.6	0.809	0.321
								433.8	0.806	0.32
								434	0.803	0.318
								434.2	0.8	0.317
								434.4	0.796	0.316
								434.6	0.793	0.314
								434.8	0.79	0.313
								435	0.787	0.312
								435.2	0.783	0.311
								435.4	0.78	0.31
								435.6	0.776	0.308
								435.8	0.773	0.307
								436	0.769	0.306
								436.2	0.765	0.305
								436.4	0.761	0.304
								436.6	0.758	0.302
								436.8	0.754	0.301
								437	0.75	0.3
								437.2	0.745	0.299
								437.4	0.741	0.298
								437.6	0.737	0.296
								437.8	0.733	0.295
								438	0.729	0.294
								438.2	0.724	0.293
								438.4	0.72	0.292
								438.6	0.715	0.291
								438.8	0.711	0.29
								439	0.707	0.288
								439.2	0.703	0.287
								439.4	0.698	0.286
								439.6	0.694	0.285
								439.8	0.689	0.284
								440	0.685	0.283
								440.2	0.68	0.282
								440.4	0.676	0.28
								440.6	0.671	0.279
								440.8	0.666	0.278
								441	0.662	0.277
								441.2	0.657	0.276
								441.4	0.652	0.275
								441.6	0.648	0.273
								441.8	0.643	0.272
								442	0.638	0.271
								442.2	0.633	0.27
								442.4	0.628	0.268
								442.6	0.623	0.267
								442.8	0.618	0.266
								443	0.612	0.265
								443.2	0.608	0.263
								443.4	0.602	0.262
								443.6	0.597	0.261
								443.8	0.592	0.259
								444	0.587	0.258
								444.2	0.582	0.257
								444.4	0.577	0.256
								444.6	0.572	0.254
								444.8	0.567	0.253
								445	0.562	0.252
								445.2	0.557	0.25
								445.4	0.552	0.249
								445.6	0.547	0.248
								445.8	0.542	0.246
								446	0.537	0.245
								446.2	0.532	0.244
								446.4	0.527	0.243
								446.6	0.522	0.242
								446.8	0.517	0.24
								447	0.512	0.239
								447.2	0.507	0.238
								447.4	0.502	0.237
								447.6	0.497	0.236
								447.8	0.492	0.235
								448	0.487	0.233
								448.2	0.482	0.232
								448.4	0.477	0.231
								448.6	0.472	0.23
								448.8	0.467	0.229
								449	0.462	0.228
								449.2	0.456	0.227
								449.4	0.452	0.226
								449.6	0.446	0.225
								449.8	0.441	0.224
								450	0.437	0.223
								450.2	0.432	0.222
								450.4	0.427	0.222
								450.6	0.422	0.221
								450.8	0.418	0.22
								451	0.413	0.219
								451.2	0.408	0.219
								451.4	0.404	0.218
								451.6	0.399	0.218
								451.8	0.395	0.217
								452	0.39	0.217
								452.2	0.386	0.217
								452.4	0.382	0.216
								452.6	0.377	0.216
								452.8	0.373	0.216
								453	0.369	0.215
								453.2	0.365	0.215
								453.4	0.36	0.215
								453.6	0.356	0.215
								453.8	0.352	0.215
								454	0.348	0.214
								454.2	0.343	0.214
								454.4	0.339	0.214
								454.6	0.335	0.214
								454.8	0.331	0.214
								455	0.327	0.214
								455.2	0.323	0.214
								455.4	0.319	0.214
								455.6	0.315	0.214
								455.8	0.311	0.214
								456	0.307	0.214
								456.2	0.304	0.214
								456.4	0.3	0.214
								456.6	0.296	0.214
								456.8	0.293	0.214
								457	0.289	0.214
								457.2	0.286	0.214
								457.4	0.282	0.214
								457.6	0.279	0.214
								457.8	0.275	0.214
								458	0.272	0.214
								458.2	0.269	0.214
								458.4	0.266	0.215
								458.6	0.263	0.215
								458.8	0.26	0.215
								459	0.256	0.215
								459.2	0.254	0.215
								459.4	0.25	0.215
								459.6	0.248	0.215
								459.8	0.244	0.215
								460	0.241	0.215
								460.2	0.239	0.215
								460.4	0.236	0.215
								460.6	0.233	0.214
								460.8	0.23	0.214
								461	0.227	0.214
								461.2	0.224	0.214
								461.4	0.222	0.214
								461.6	0.219	0.214
								461.8	0.216	0.214
								462	0.214	0.213
								462.2	0.211	0.213
								462.4	0.209	0.213
								462.6	0.206	0.213
								462.8	0.204	0.212
								463	0.202	0.212
								463.2	0.199	0.212
								463.4	0.197	0.212
								463.6	0.194	0.212
								463.8	0.192	0.212
								464	0.19	0.211
								464.2	0.188	0.211
								464.4	0.186	0.211
								464.6	0.184	0.211
								464.8	0.182	0.211
								465	0.18	0.21
								465.2	0.177	0.21
								465.4	0.176	0.21
								465.6	0.173	0.21
								465.8	0.171	0.21
								466	0.17	0.21
								466.2	0.168	0.21
								466.4	0.166	0.21
								466.6	0.164	0.21
								466.8	0.162	0.21
								467	0.161	0.21
								467.2	0.159	0.21
								467.4	0.157	0.21
								467.6	0.156	0.21
								467.8	0.154	0.21
								468	0.153	0.21
								468.2	0.151	0.21
								468.4	0.149	0.211
								468.6	0.148	0.211
								468.8	0.147	0.211
								469	0.145	0.211
								469.2	0.144	0.211
								469.4	0.143	0.211
								469.6	0.141	0.212
								469.8	0.14	0.212
								470	0.139	0.212
								470.2	0.138	0.213
								470.4	0.137	0.213
								470.6	0.136	0.214
								470.8	0.134	0.214
								471	0.133	0.215
								471.2	0.132	0.215
								471.4	0.131	0.216
								471.6	0.13	0.216
								471.8	0.129	0.217
								472	0.128	0.218
								472.2	0.128	0.218
								472.4	0.127	0.219
								472.6	0.126	0.22
								472.8	0.125	0.221
								473	0.124	0.221
								473.2	0.123	0.222
								473.4	0.123	0.223
								473.6	0.122	0.224
								473.8	0.121	0.224
								474	0.121	0.225
								474.2	0.12	0.226
								474.4	0.119	0.227
								474.6	0.118	0.228
								474.8	0.118	0.229
								475	0.117	0.23
								475.2	0.117	0.231
								475.4	0.116	0.232
								475.6	0.115	0.232
								475.8	0.115	0.233
								476	0.114	0.235
								476.2	0.114	0.236
								476.4	0.114	0.237
								476.6	0.113	0.238
								476.8	0.113	0.239
								477	0.112	0.24
								477.2	0.112	0.241
								477.4	0.111	0.242
								477.6	0.111	0.243
								477.8	0.11	0.244
								478	0.11	0.245
								478.2	0.11	0.246
								478.4	0.109	0.247
								478.6	0.109	0.248
								478.8	0.108	0.248
								479	0.108	0.249
								479.2	0.108	0.25
								479.4	0.107	0.251
								479.6	0.107	0.252
								479.8	0.107	0.253
								480	0.106	0.254
								480.2	0.106	0.255
								480.4	0.106	0.255
								480.6	0.106	0.256
								480.8	0.105	0.257
								481	0.105	0.258
								481.2	0.105	0.258
								481.4	0.105	0.259
								481.6	0.104	0.26
								481.8	0.104	0.26
								482	0.104	0.261
								482.2	0.104	0.262
								482.4	0.103	0.262
								482.6	0.103	0.263
								482.8	0.103	0.264
								483	0.102	0.264
								483.2	0.102	0.265
								483.4	0.102	0.265
								483.6	0.102	0.266
								483.8	0.102	0.267
								484	0.101	0.267
								484.2	0.101	0.268
								484.4	0.101	0.269
								484.6	0.101	0.269
								484.8	0.101	0.27
								485	0.1	0.27
								485.2	0.1	0.271
								485.4	0.1	0.272
								485.6	0.1	0.272
								485.8	0.1	0.273
								486	0.099	0.274
								486.2	0.099	0.274
								486.4	0.099	0.275
								486.6	0.099	0.276
								486.8	0.099	0.277
								487	0.099	0.277
								487.2	0.099	0.278
								487.4	0.099	0.279
								487.6	0.099	0.28
								487.8	0.099	0.281
								488	0.099	0.282
								488.2	0.099	0.283
								488.4	0.099	0.284
								488.6	0.099	0.285
								488.8	0.099	0.286
								489	0.099	0.288
								489.2	0.099	0.289
								489.4	0.099	0.29
								489.6	0.099	0.292
								489.8	0.1	0.293
								490	0.1	0.295
								490.2	0.1	0.296
								490.4	0.1	0.298
								490.6	0.101	0.3
								490.8	0.101	0.301
								491	0.101	0.303
								491.2	0.101	0.305
								491.4	0.102	0.306
								491.6	0.102	0.308
								491.8	0.102	0.31
								492	0.103	0.312
								492.2	0.103	0.314
								492.4	0.103	0.316
								492.6	0.104	0.318
								492.8	0.104	0.319
								493	0.105	0.321
								493.2	0.105	0.323
								493.4	0.105	0.325
								493.6	0.106	0.327
								493.8	0.106	0.329
								494	0.106	0.33
								494.2	0.107	0.332
								494.4	0.107	0.334
								494.6	0.107	0.336
								494.8	0.107	0.337
								495	0.108	0.339
								495.2	0.108	0.341
								495.4	0.108	0.343
								495.6	0.108	0.344
								495.8	0.108	0.346
								496	0.109	0.347
								496.2	0.109	0.349
								496.4	0.109	0.35
								496.6	0.109	0.351
								496.8	0.109	0.353
								497	0.109	0.354
								497.2	0.109	0.355
								497.4	0.109	0.357
								497.6	0.109	0.358
								497.8	0.109	0.359
								498	0.109	0.36
								498.2	0.11	0.361
								498.4	0.109	0.362
								498.6	0.109	0.363
								498.8	0.109	0.364
								499	0.109	0.365
								499.2	0.109	0.366
								499.4	0.109	0.366
								499.6	0.109	0.367
								499.8	0.108	0.367
								500	0.108	0.368
								500.2	0.108	0.368
								500.4	0.108	0.368
								500.6	0.107	0.368
								500.8	0.107	0.369
								501	0.107	0.369
								501.2	0.106	0.368
								501.4	0.106	0.368
								501.6	0.106	0.368
								501.8	0.105	0.368
								502	0.105	0.367
								502.2	0.104	0.367
								502.4	0.104	0.366
								502.6	0.103	0.366
								502.8	0.102	0.365
								503	0.102	0.364
								503.2	0.101	0.364
								503.4	0.101	0.363
								503.6	0.1	0.362
								503.8	0.1	0.361
								504	0.099	0.36
								504.2	0.098	0.359
								504.4	0.098	0.357
								504.6	0.097	0.356
								504.8	0.097	0.354
								505	0.096	0.353
								505.2	0.095	0.351
								505.4	0.094	0.349
								505.6	0.094	0.348
								505.8	0.093	0.345
								506	0.092	0.343
								506.2	0.092	0.341
								506.4	0.091	0.339
								506.6	0.09	0.337
								506.8	0.089	0.334
								507	0.089	0.332
								507.2	0.088	0.329
								507.4	0.087	0.327
								507.6	0.086	0.324
								507.8	0.085	0.321
								508	0.085	0.318
								508.2	0.084	0.315
								508.4	0.083	0.312
								508.6	0.082	0.308
								508.8	0.081	0.305
								509	0.081	0.302
								509.2	0.08	0.298
								509.4	0.079	0.295
								509.6	0.078	0.291
								509.8	0.077	0.288
								510	0.076	0.284
								510.2	0.075	0.28
								510.4	0.075	0.277
								510.6	0.074	0.273
								510.8	0.073	0.269
								511	0.072	0.265
								511.2	0.071	0.261
								511.4	0.071	0.257
								511.6	0.07	0.253
								511.8	0.069	0.249
								512	0.068	0.245
								512.2	0.067	0.241
								512.4	0.067	0.237
								512.6	0.066	0.233
								512.8	0.065	0.228
								513	0.064	0.224
								513.2	0.063	0.22
								513.4	0.063	0.216
								513.6	0.062	0.212
								513.8	0.061	0.208
								514	0.06	0.203
								514.2	0.06	0.199
								514.4	0.059	0.195
								514.6	0.059	0.191
								514.8	0.058	0.188
								515	0.057	0.184
[truncated: 111 more columns]

## Sheet: Supplementary Fig.3
Source data for Supplementary Fig.3b-c
Supplementary Fig.3b																						Supplementary Fig.3c
	FiLa-C-Cytosol										FiLa-C-Nucleus												FiLa-C-Mitochondria
FBS (%)	0	1	5	10	10	10	10	0	0	0	0	1	5	10	10	10	10	0	0	0		FBS (%)	0	1	5	10	10	10	10	0	0	0
Glc (mM)	0	0	0	0	0.1	1	25	0.1	1	25	0	0	0	0	0.1	1	25	0.1	1	25		Glc (mM)	0	0	0	0	0.1	1	25	0.1	1	25
	3.18	3.67	3.84	3.32	3.73	3.32	3.39	3.22	2.73	3.87	2.08	3.419	2.913	3.173	2.18	2.454	2.749	3.168	3.39	2.756			3.43	3.95	3.83	3.02	3.55	3.77	3.52	2.92	3.46	3.8
	2.45	2.64	3.28	3.34	3.93	3.57	3.6	2.85	3.75	2.86	1.865	2.556	4.083	4.034	3.083	2.72	3.174	2.869	2.868	2.869			3.69	2.71	4.05	3.2	3.94	2.66	3.47	3.24	2.42	3.27
	3.5	2.73	3.7	3.81	3.47	2.72	3.68	2.87	3.81	3.95	2.763	2.54	3.949	3.065	4.147	3.469	3.647	2.146	2.696	3.035			3.16	2.83	3.08	3.23	2.9	3.2	3.1	2.57	2.61	3.02
	3.3	3.64	3.5	2.59	3.56	3.18	3.8	3.42	3.07	3.43	2.874	2.78	3.442	3.282	3.571	3.708	4.15	2.171	2.591	2.984			3.78	3.1	3.09	3.54	3.07	2.66	4.09	2.74	3.5	2.25
	2.84	3.5	3.59	2.62	3.59	3.29	3.82	3.28	2.5	3.62	1.982	2.704	2.966	3.83	3.856	3.278	4.083	2.012	4.035	2.477			3.68	3.01	3.8	3.45	3.45	4.04	2.67	2.6	2.24	3.67
	3.07	3.22	3.86	3.66	3.85	3.22	3.21	3.21	3.63	3.59	2.157	3.373	3.203	3.376	3.978	3.695	4.262	3.348	2.699	3.101			3.18	3.04	3.13	3.71	3.23	3.19	4.07	3.67	2.56	3.51
	2.83	3.83	3.81	3.97	3.88	3.66	2.75	3.12	3.06	3.34	2.667	2.903	2.803	2.433	3.466	4.113	4.302	2.075	2.567	3.111			3.54	3.49	3.2	3.67	3.33	4.07	3.03	2.95	2.64	3.64
	3.3	3.13	3.89	2.79	3.8	3.26	3.19	2.88	3.13	3.2	2.622	3.869	3.738	3.599	3.199	2.705	2.636	3.797	3.719	2.67			3.35	3.3	3.88	3.83	3.4	3.58	2.5	3.73	3.32	3.86
	3.32	3.07	3.48	3.83	3.83	3.54	3.67	3.57	2.99	3.5	2.824	3.146	3.3	2.916	3.38	4.246	4.22	3.607	3.018	3.203			3.15	3.44	3.25	2.9	3.09	4.06	3.1	2.36	3.06	2.39
	3.51	2.64	3.5	3.96	2.94	3.26	3.47	3.11	2.66	3.17	2.516	2.879	3.671	3.664	2.095	4.056	3.945	3.763	2.626	2.634			3.1	3.08	3.34	3.9	3.73	2.48	3.65	2.25	3.78	3.65
	2.74	3.22	3.74	3.62	3.7	3.29	3.56	2.6	3.1	3.04	1.907	3.573	2.12	4.134	3.939	3.767	2.678	3.318	3.905	2.767			3.25	2.86	2.86	2.74	2.84	3.16	3.87	2.51	2.47	3.18
	3.06	2.53	3.5	2.89	3.33	3.34	3.16	3.12	3.45	3.55	2.367	2.747	3.638	4.008	3.717	2.909	3.327	2.532	2.565	3.009			3.03	3.04	2.27	3.83	2.96	2.56	3.3	2.47	3.43	3.45
	2.92	3.32	3.57	3.86	3.1	3.33	3.06	3.04	2.83	3.28	1.916	3.586	3.255	3.723	3.737	3.835	2.945	2.734	3.078	3.081			3.34	3.76	2.54	3.76	3.28	3.35	3.99	2.33	4.02	2.94
	2.96	3.3	2.98	3.06	3.79	3.64	3.58	2.82	2.54	3.34	2.078	3.344	3.054	3.426	2.801	4.21	4.064	3.276	3.298	3.815			3.19	2.63	3.78	3.81	3.68	3.77	3.51	2.61	3.6	3.02
	3.22	2.98	2.98	3.08	3.34	3.37	3.64	2.71	3.74	3.52	2.633	3.394	3.554	3.736	4.105	3.751	3.399	3.065	2.672	2.744			3.35	3.04	3.14	3.58	2.96	2.23	2.66	2.4	3.36	3.36
	3.09	3.5	2.94	3.38	3.34	3.46	3.05	2.98	3.7	3.24	3.044	2.557	4.004	3.966	4.047	3.824	3.977	2.848	3.778	3.448			3.66	3.4	2.62	3.18	3.21	3.69	3.04	3.7	2.92	3.22
	2.5	3.29	3.43	3.22	3.67	3.6	3	3.24	2.41	3.83	2.658	3.832	4.018	3.064	3.908	3.879	4.041	3.146	2.961	3.077			3.42	3.97	2.81	3.5	2.78	3.94	3.89	3.61	2.12	2.66
	3.16	3.1	2.44	2.79	3.86	3.22	3.4	2.96	3.65	3.09	3.035	3.274	3.841	3.803	2.542	4.316	2.983	3.188	3.261	2.915			3.81	2.76	2.73	3.66	3.31	3.98	3.94	3.16	3.36	3.24
	3.16	3.64	3.55	3.12	2.72	3.43	3.6	3.1	3.4	2.86	2.598	3.019	3.463	4.007	3.931	4.238	3.864	2.646	3.576	3.706			3.35	3.89	2.42	3.68	3.15	3.57	3	2.65	3.28	3.18
	3.24	3.72	3.5	3	3.56	2.97	3.53	3.14	3.07	3.76	2.345	3.188	3.641	3.626	4.082	4.178	4.355	3.276	2.754	3.986			3.32	3.97	3.01	2.92	3.49	3.68	3.69	3.11	3.8	2.62

## Sheet: Supplementary Fig.4
Source data for Supplementary Fig.4b,d,f
Supplementary Fig.4b				Supplementary Fig.4d				Supplementary Fig.4f
	Time (s)	FiLa-C			Time (s)	FiLa-C-Nuc			Time (s)	FiLa-C-Mit
	0	3.03			0	3.098			0	10.978
	30	3.02			30	3.023			30	11.088
	60	3.008			60	3.001			60	10.99
	90	3.004			90	2.916			90	11.035
	120	3.26			120	2.951			120	11.281
	150	3.327			150	2.978			150	11.286
	180	3.256			180	2.924			180	10.075
Add Glc	210	3.43		Add Glc	210	2.988		Add Glc	210	10.639
	240	3.546			240	3.167			240	10.832
	270	3.538			270	3.31			270	11.584
	300	3.555			300	3.218			300	11.405
	330	3.585			330	3.265			330	11.066
	360	3.691			360	3.349			360	11.028
	390	3.706			390	3.283			390	11.246
	420	3.758			420	3.334			420	10.564
	450	3.762			450	3.357			450	11.041
	480	3.833			480	3.388			480	10.882
	510	3.862			510	3.385			510	9.584
	540	3.936			540	3.486			540	13.061
Add Oligo	570	3.983		Add Oligo	570	3.556		Add Oligo	570	13.907
	600	4.024			600	3.64			600	14.138
	630	4.048			630	3.671			630	14.533
	660	4.037			660	3.678			660	14.446
	690	4.044			690	3.727			690	14.838
	720	4.048			720	3.748			720	15.147
	750	4.036			750	3.858			750	15.43
	780	4.107			780	3.775			780	15.404
	810	4.142			810	3.831			810	14.938
	840	4.093			840	3.884			840	15.03
	870	4.197			870	3.935		Add 2-DG	870	15.323
	900	4.896			900	4.613			900	14.718
Add 2-DG	930	4.652		Add 2-DG	930	4.657			930	16.401
	960	4.415			960	4.445			960	15.852
	990	4.027			990	4.418			990	15.395
	1020	3.779			1020	3.838			1020	14.652
	1050	3.612			1050	3.514			1050	13.682
	1080	3.441			1080	3.358			1080	13.309
	1110	3.231			1110	3.213			1110	13.023
	1140	3.091			1140	3.098			1140	12.74
	1170	2.899			1170	2.978			1170	12.463
	1200	2.795			1200	2.847			1200	11.4
	1230	2.376			1230	2.831			1230	10.507
	1260	2.269			1260	2.679			1260	10.218
	1290	2.213			1290	2.594			1290	10.072
	1320	2.262			1320	2.53			1320	9.342
	1350	2.231			1350	2.498			1350	10.35
	1380	2.186			1380	2.428			1380	9.999
	1410	2.126			1410	2.322			1410	9.911
	1440	2.012			1440	2.322			1440	9.716
	1470	1.997			1470	2.266			1470	9.596
	1500	1.976			1500	2.24			1500	9.354
	1530	1.922			1530	2.196			1530	9.424
	1560	1.957			1560	2.154			1560	9.096
	1590	1.874			1590	2.086			1590	9.199
	1620	1.924			1620	2.085			1620	9.308
	1650	1.943			1650	2.066			1650	9.198
	1680	1.884			1680	1.998			1680	9.036
	1710	1.833			1710	1.986			1710	8.916
	1740	1.852			1740	1.977			1740	9.014
	1770	1.876			1770	1.916			1770	8.608
	1800	1.832			1800	1.937			1800	7.882
	1830	1.838			1830	1.89			1830	8.303
	1860	1.856			1860	1.894			1860	8.277
	1890	1.847			1890	1.914			1890	8.084
	1920	1.796			1920	1.885			1920	8.163
	1950	1.791			1950	1.887			1950	8.31
	1980	1.833			1980	1.847			1980	8.293

## Sheet: Supplementary Fig.5
Source data for Supplementary Fig.5b,d,f,h
Supplementary Fig.S5b						Supplementary Fig.S5d						Supplementary Fig.S5f						Supplementary Fig.S5h
	Time (s)	FiLa-C	FiLa-C-Nuc	FiLa-C-Mit			Time (s)	FiLa-C	FiLa-C-Nuc	FiLa-C-Mit			Time (s)	FiLa-C	FiLa-C-Nuc	FiLa-C-Mit			Time (s)	FiLa-C	FiLa-C-Nuc	FiLa-C-Mit
	0	3.19978	2.40482	7.68675			0	3.26888	2.48543	6.84571			0	3.28578	2.90917	8.09064			0	3.301	2.60018	7.2789
	30	3.20042	2.45297	7.56449			30	3.35111	2.49053	7.28398			30	3.30509	2.9357	8.05052			30	3.32404	2.61419	7.27029
	60	3.17927	2.46753	7.64123			60	3.37953	2.4583	7.4913			60	3.35224	2.94695	8.28748			60	3.3188	2.52294	7.19381
	90	3.20049	2.46662	7.85662			90	3.3743	2.51814	7.54018			90	3.38672	2.98905	8.5294			90	3.30061	2.56429	6.87545
	120	3.17599	2.43936	7.87853			120	3.35636	2.53793	7.19954			120	3.36665	2.94201	8.45929			120	3.27784	2.61102	6.76453
Add Oxamate	150	2.91485	1.50658	7.33954		Add Rotenone	150	3.30603	2.52683	6.67324		Add AR-C155858	150	3.22832	2.7953	8.0279		Add Ionomycin	150	3.18526	2.44864	6.50197
	180	2.37319	1.32137	6.86202			180	3.34413	2.52364	6.79442			180	3.10466	2.78796	7.78524			180	3.17096	2.35415	6.3341
	210	2.09183	1.31957	6.58347			210	3.29513	2.50203	7.02212			210	3.06506	2.6971	7.64825			210	3.20159	2.41287	5.67757
	240	1.98359	1.34733	6.41904			240	3.24227	2.55783	6.96055			240	3.00902	2.69983	7.93869			240	3.22934	2.51213	5.60803
	270	1.97236	1.35914	6.39659			270	3.29395	2.53121	7.04216			270	2.95504	2.72098	7.45812			270	3.2295	2.59924	6.0531
	300	2.01218	1.39768	6.43114			300	3.34204	2.56791	7.06399			300	2.98086	2.71035	7.05222			300	3.22494	2.6243	5.39672

## Sheet: Supplementary Fig.7
Source data for Supplementary Fig.7
Supplementary Fig. 7
Time (min)	T1DM					T1DM+Insulin
0	545.4	484.2	469.8	487.8	509.4	509.4	504	444.6	520.2	480.6
3	545.4	469.8	464.4	484.2	514.8	572.4	462.6	577.8	453.6	498.6
6	507.6	484.2	453.6	399.6	511.2	496.8	423	507.6	437.4	507.6
11	505.8	502.2	446.4	453.6	383.4	442.8	358.2	415.8	309.6	354.6
16	471.6	505.8	433.8	480.6	437.4	243	226.8	280.8	282.6	309.6
21	493.2	520.2	471.6	473.4	538.2	192.6	239.4	174.6	230.4	282.6
26	502.2	525.6	424.8	435.6	500.4	226.8	108	189	145.8	266.4
31	505.8	513	464.4	451.8	502.2	120.6	113.4	165.6	156.6	122.4

## Sheet: Supplementary Fig.8
Source data for Supplementary Fig.8
Tai Chi athletes					Rugby atheles
No.	Age	Height (cm)	Weight (kg)	BMI (kg/m2)	No.	Age	Height (cm)	Weight (kg)	BMI (kg/m2)
1	20	180	72	22.2	1	22	187	93	26.6
2	20	170	65	22.5	2	17	184	65	19.2
3	20	163	55	20.7	3	17	185	70	20.5
4	20	180	85	26.2	4	20	178	75	23.7
5	21	184	95	28.1	5	17	183	63	18.8
6	22	179	75	23.4	6	17	177	74	23.6
7	21	187	72	20.6	7	16	191	88	24.1
8	20	173	60	20	8	16	180	68	21
9	22	175	65	21.2	9	16	183	69	20.6
10	22	180	75	23.1	10	15	171	55	18.8
